## Meta- and Pooled Analyses

### The Association Between Obesity and Low Back Pain: A Meta-Analysis

Rahman Shiri\*, Jaro Karppinen, Päivi Leino-Arjas, Svetlana Solovieva, and Eira Viikari-Juntura

\* Correspondence to Dr. Rahman Shiri, Centre of Expertise for Health and Work Ability, Finnish Institute of Occupational Health, Topeliuksenkatu 41 a A, FIN-00250 Helsinki, Finland (e-mail: rahman.shiri@ttl.fi).

Initially submitted June 15, 2009; accepted for publication October 5, 2009.

This meta-analysis assessed the association between overweight/obesity and low back pain. The authors systematically searched the Medline (National Library of Medicine, Bethesda, Maryland) and Embase (Elsevier, Amsterdam, the Netherlands) databases until May 2009. Ninety-five studies were reviewed and 33 included in the meta-analyses. In cross-sectional studies, obesity was associated with increased prevalence of low back pain in the past 12 months (pooled odds ratio (OR) = 1.33, 95% confidence interval (CI): 1.14, 1.54), seeking care for low back pain (OR = 1.56, 95% CI: 1.46, 1.67), and chronic low back pain (OR = 1.43, 95% CI: 1.28, 1.60). Compared with nonoverweight people, overweight people had a higher prevalence of low back pain but a lower prevalence of low back pain compared with obese people. In cohort studies, only obesity was associated with increased incidence of low back pain for  $\geq 1$  day in the past 12 months (OR = 1.53, 95% CI: 1.22, 1.92). Results remained consistent after adjusting for publication bias and limiting the analyses to studies that controlled for potential confounders. Findings indicate that overweight and obesity increase the risk of low back pain. Overweight and obesity have the strongest association with seeking care for low back pain and chronic low back pain.

incidence; overweight; prevalence; publication bias; referral and consultation

Abbreviation: BMI, body mass index.

Obesity is a growing public health concern. Globally, the number of overweight or obese people is dramatically increasing (1). Obesity contributes substantially to the burden of chronic medical conditions, and these medical conditions place a high economic burden on the health care systems (1).

Low back pain is also a common health problem (2). It is a common cause of work-related disability and sickness absence (3). In the general population, the 1-month prevalence of low back pain ranges from 30% to 40% (3, 4); the annual prevalence of low back pain ranges from 25% to 60% (3–5) and of chronic low back pain from 10% to 13% (6, 7). Low back pain is more common in women than in men (4, 8).

The association between obesity and low back pain remains controversial. Few reviews on the relation between obesity and low back pain have been published so far. Five of them were nonsystematic, including only 6–8 studies (9–12) or only studies published between 2000 and March 2006 (13). The only known systematic review reported

inconsistent results regarding the link between weight-related factors and low back pain (14). None of these reviews performed a meta-analysis or reported evidence of a temporal relation between obesity and low back pain.

Our aim was to provide a systematic literature review of the association between overweight/obesity and low back pain and to estimate the magnitude of such an association using meta-analysis. To address causality of associations, cross-sectional and cohort studies were analyzed separately.

## MATERIALS AND METHODS

### Search strategy

Studies of interest were identified by searches of the Medline (National Library of Medicine, Bethesda, Maryland) and Embase (Elsevier, Amsterdam, the Netherlands) databases from 1966 until May 2009 using predefined keywords (Web Table 1; this information is described in the first of

4 supplementary tables, each referred to as “Web table” in the text and posted on the *Journal’s* website (<http://aje.oupjournals.org/>). In addition to overweight/obesity, which is the focus of this review, our search covered a larger set of cardiovascular or lifestyle risk factors, such as smoking, physical activity/inactivity, hypertension, dyslipidemia, diabetes, and inflammatory factors (15–17). Our search was limited to human populations. All languages were accepted. We excluded reviews, case reports, letters, editorials, guidelines, and comments. We also searched the reference lists of included studies.

## Study selection

Two authors independently examined all titles and abstracts. We scrutinized the full text of relevant papers and determined whether they met the inclusion criteria. We included original articles on human populations with a cohort, case-control, or cross-sectional design. Studies focusing solely on clinical populations, case-control studies with controls derived from the patient populations, studies with a sample size of less than 30, and studies with a response rate of less than 60% or not reported were excluded (Figure 1). We also excluded studies on specific back disorders (16), musculoskeletal or spinal pain without specification to the back, the prognosis of low back pain, and height only.

## Quality assessment

Two reviewers independently assessed the quality of the studies by using a modification of the Cochrane quality criteria for systematic assessment of nonexperimental studies (18). Disagreements were solved through discussion.

We assessed the occurrence and severity of 4 possible sources of bias: selection, performance, detection, and attrition (Web Table 2). Studies with any definite biases were excluded from our review. Only those studies with no or minor selection bias were included in the meta-analysis.

## Meta-analysis

We used cutpoints recommended by the World Health Organization for body mass index (BMI) and defining overweight as a BMI of 25–29.9 kg/m<sup>2</sup> and obesity as a BMI of  $\geq 30$  kg/m<sup>2</sup> (19, 20). Because a number of studies did not distinguish between overweight and obesity, we also conducted meta-analyses for overweight/obesity, defining BMI as  $\geq 25$  kg/m<sup>2</sup>. In addition, studies of adults that reported an estimated BMI of  $\geq 24$  kg/m<sup>2</sup> for overweight/obesity or BMI of  $>28.5$  kg/m<sup>2</sup> for obesity were included in the meta-analyses. Studies of adolescents that defined overweight or obesity by using internationally acceptable age- and sex-specific cutpoints for BMI (21) were also included in the meta-analyses.

Studies that reported a risk estimate (odds ratio or relative risk) for overweight or obesity were eligible for the meta-analysis. A minimum requirement was adjustment for age and gender. A study was also chosen if the study population

was of either gender, represented a narrow age group, or included stratified analysis by age and gender. We contacted the authors of the studies that reported only unadjusted risk estimates, did not use World Health Organization–recommended cutpoints for BMI, or did not report gender-specific results. Of 12 contacted authors, 7 (22–28) provided additional gender-specific confounder-adjusted results.

We used combinable low back pain outcomes suggested by the Meta-Analysis of Pain in the Lower Back and Work Exposures (MAPLE) collaborative group (29). Chronic low back pain was defined as pain that lasts for longer than 7–12 weeks (3) or pain experienced for more than 30 days in the past 12 months (29). Disabling low back pain was defined as recurrent or continuous low back pain of a moderate to severe degree or low back pain with functional impairment. Prevalent low back pain was defined on the basis of cross-sectional studies and incident low back pain on the basis of cohort studies.

We pooled the odds ratios of low back pain for the BMI subgroups to obtain an overall estimate for overweight/obesity. We also pooled the odds ratios of low back pain for the study population subgroups to obtain an estimate for the total study population. We calculated a new odds ratio of low back pain for overweight or obese subjects for studies that used underweight as a reference category and compared normal, overweight, or obese people with underweight subjects (24, 30–33). For these studies, we calculated the standard error from the natural logarithm of the odds ratio and confidence intervals, divided the odds ratio of overweight or obesity by the odds ratio of normal weight, and then estimated new confidence intervals for the obtained odds ratios.

We conducted random-effects meta-analyses. Random-effects meta-analysis assumes that there are real differences between individual studies regarding the magnitude of the association between overweight/obesity and low back pain. It considers both between-study and within-study variability. The random-effects model usually produces a confidence interval wider than the fixed-effect model does. Results from a random-effects model are usually more conservative than those of a fixed-effect model (18).

Heterogeneity was assessed by the Cochran’s chi-square ( $Q$  test) and  $I^2$  statistic (34, 35). Heterogeneity is any kind of variability in the association between overweight/obesity and low back pain among different studies. Significant heterogeneity shows that this variability is not due to chance alone. Testing for heterogeneity may be insensitive to true between-study variability for certain study characteristics. Values of the  $I^2$  statistic range from 0% to 100% and show the proportion of total variation across studies not due to chance. Values of 25%, 50%, and 75% correspond to low, moderate, and high heterogeneity, respectively (35).

The small-study effect and the effect of low-quality studies were assessed by cumulative meta-analysis and by subgroup analysis. For cumulative meta-analysis, the studies were ranked in descending order first by the tools used for anthropometry (measured vs. self-reported weight and height), second by the presence or absence of detection or attrition bias, and third by sample size.

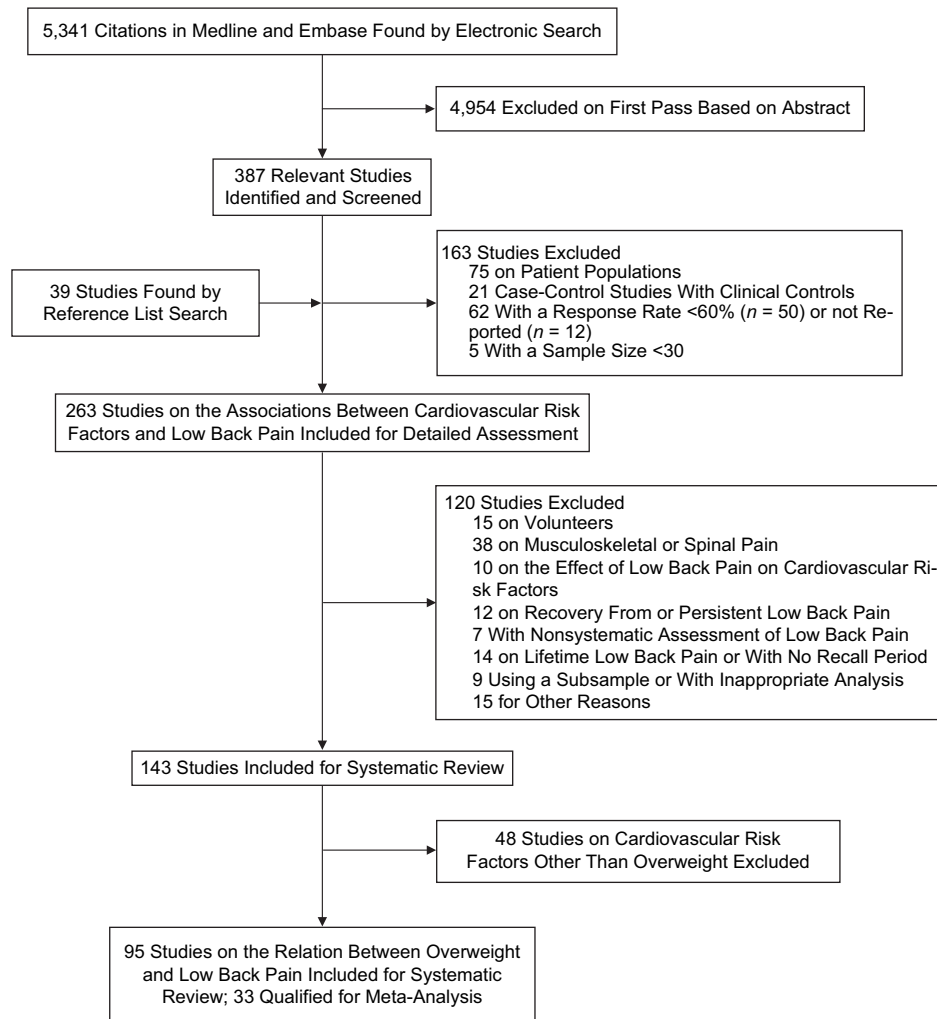

**Figure 1.** Flowchart of the search strategy and selection of studies to assess the association between obesity and low back pain.

Publication bias was examined with funnel plots. A funnel plot is a scatter plot of studies included in the meta-analysis, with the magnitude of the overweight/obesity effect on the horizontal axis and the weight of the study, such as the inverse standard error or sample size, on the vertical axis. The funnel plot is based on the fact that precision in assessing the association between overweight/obesity and low back pain will increase as the sample size of studies increases. An asymmetrical appearance of dots in the funnel plot can be due to the presence of publication bias (36). Asymmetry of the funnel plots was assessed by using 3 statistical methods: the rank correlation method (Begg's test) (37), regression analysis (Egger's test) (38), and the trim and fill method (39). In the trim and fill method, we used the fixed-effect model for trimming and the random-effects model for filling to obtain the adjusted pooled estimates. We assessed publication bias for cross-sectional and cohort studies as well as for each low back pain outcome. Stata software (Stata Corporation, College

Station, Texas), versions 8.2 and 10, was used to perform the meta-analyses.

## RESULTS

We identified 263 relevant study reports on the associations between cardiovascular risk factors and low back pain for detailed assessment (Figure 1). Of the relevant studies, 95 on the relation between overweight/obesity and low back pain were included in the systematic review (Web Tables 3 and 4). Of these 95, studies were excluded from the meta-analysis for the following reasons: selection bias ( $n = 16$ , Web Table 3), noncombinable outcome (only one study representing an outcome, e.g., recurrent low back pain, hospitalization due to low back pain, disability retirement due to back pain;  $n = 6$ ) (40–45), focus on only weight without any report of an adjusted risk estimate ( $n = 8$ ) (46–53), no report of unadjusted prevalence/incidence in subgroups of BMI or

**Table 1.** Association Between Overweight/Obesity and the Prevalence of Low Back Pain in the Past Month or Past 12 Months (Cross-Sectional Studies)

| First Author<br>(Reference No.)     | Population   | Country        | Year | Sample,<br>No. | BMI                            |             | OR   | 95% CI     | Heterogeneity |                |           | Detection or<br>Attrition Bias |
|-------------------------------------|--------------|----------------|------|----------------|--------------------------------|-------------|------|------------|---------------|----------------|-----------|--------------------------------|
|                                     |              |                |      |                | Cutpoint,<br>kg/m <sup>2</sup> | Tool Used   |      |            | P             | I <sup>2</sup> | 95%<br>CI |                                |
| Low back pain in the past month     |              |                |      |                |                                |             |      |            |               |                |           |                                |
| Overweight or obesity<br>(BMI ≥24)  |              |                |      |                |                                |             |      |            |               |                |           |                                |
| Adults                              |              |                |      |                |                                |             |      |            |               |                |           |                                |
| Croft (30)                          | General      | United Kingdom | 1994 | 9,003          | ≥24.7                          | Measured    | 1.11 | 0.98, 1.25 |               |                |           | 1                              |
| Mutsui (107)                        | Occupational | Japan          | 1997 | 3,042          | >24 m; >25 w                   | Self-report | 1.03 | 0.87, 1.22 |               |                |           | 0                              |
| Leino-Arjas (108)                   | General      | Finland        | 1998 | 7,544          | ≥24                            | Self-report | 1.24 | 1.13, 1.36 |               |                |           | 1                              |
| Pooled                              |              |                |      | 19,589         |                                |             | 1.14 | 1.03, 1.27 | 0.11          | 54             | 0, 87     |                                |
| Adolescents                         |              |                |      |                |                                |             |      |            |               |                |           |                                |
| Watson (109)                        | Children     | United Kingdom | 2003 | 1,376          | ≥20.3                          | Measured    | 1.30 | 0.98, 1.73 |               |                |           | 0                              |
| Pooled<br>(adults + adolescents)    |              |                |      | 20,965         |                                |             | 1.16 | 1.05, 1.27 | 0.17          | 39             | 0, 79     |                                |
| Overweight or obesity<br>(BMI ≥27)  |              |                |      |                |                                |             |      |            |               |                |           |                                |
| Schneider (110)                     | General      | Germany        | 2005 | 3,488          | ≥27.3 m; ≥27.8 w               | Measured    | 1.24 | 1.05, 1.46 |               |                |           | 0                              |
| Croft (30)                          | General      | United Kingdom | 1994 | 9,003          | >27.3                          | Measured    | 1.15 | 0.95, 1.38 |               |                |           | 1                              |
| Leino-Arjas (108)                   | General      | Finland        | 1998 | 7,544          | ≥27                            | Self-report | 1.24 | 1.07, 1.42 |               |                |           | 1                              |
| Pooled                              |              |                |      | 20,035         |                                |             | 1.22 | 1.11, 1.34 | 0.79          | 0              | 0, 90     |                                |
| Low back pain in the past 12 months |              |                |      |                |                                |             |      |            |               |                |           |                                |
| Overweight                          |              |                |      |                |                                |             |      |            |               |                |           |                                |
| Shiri (92)                          | General      | Finland        | 2008 | 2,515          | 25–29.9                        | Measured    | 1.00 | 0.80, 1.24 |               |                |           | 0                              |
| Leino-Arjas (93)                    | Occupational | Finland        | 2006 | 901            | 25–29.9                        | Measured    | 1.34 | 0.92, 1.95 |               |                |           | 0                              |
| Leboeuf-Yde (111)                   | Twins        | Denmark        | 1998 | 29,424         | 25–29.0                        | Self-report | 1.30 | 1.20, 1.40 |               |                |           | 0                              |
| Miranda (23)                        | Occupational | Finland        | 2008 | 3,609          | 25–29.9                        | Self-report | 1.30 | 1.12, 1.50 |               |                |           | 0                              |
| Karahan (28)                        | Occupational | Turkey         | 2009 | 1,600          | 25–29.9                        | Self-report | 1.24 | 0.93, 1.65 |               |                |           | 0                              |
| Raanaas (27)                        | Occupational | Norway         | 2008 | 801            | 25–29.9                        | Self-report | 1.00 | 0.70, 1.41 |               |                |           | 0                              |
| Wright (112)                        | General      | United Kingdom | 1995 | 24,000         | 25–29.9 m; 23.8–28.5 w         | Self-report | 1.20 | 1.12, 1.28 |               |                |           | 1                              |
| Pooled                              |              |                |      | 62,850         |                                |             | 1.23 | 1.15, 1.31 | 0.23          | 25             | 0, 67     |                                |
| Adolescents                         |              |                |      |                |                                |             |      |            |               |                |           |                                |
| Hestbaek (24)                       | Twins        | Denmark        | 2006 | 9,497          | Age and gender specific        | Self-report | 1.12 | 0.95, 1.33 |               |                |           | 0                              |
| Pooled<br>(adults + adolescents)    |              |                |      | 72,347         |                                |             | 1.22 | 1.14, 1.29 | 0.24          | 24             | 0, 65     |                                |

|                               |              |                |      |         |                         |             |      |            |      |    |       |
|-------------------------------|--------------|----------------|------|---------|-------------------------|-------------|------|------------|------|----|-------|
| Overweight or obesity         |              |                |      |         |                         |             |      |            |      |    |       |
| Adults                        |              |                |      |         |                         |             |      |            |      |    |       |
| Shiri (92)                    | General      | Finland        | 2008 | 2,515   | ≥25                     | Measured    | 1.07 | 0.88, 1.31 |      |    | 0     |
| Leino-Arjas (93)              | Occupational | Finland        | 2006 | 901     | ≥25                     | Measured    | 1.55 | 1.12, 2.13 |      |    | 0     |
| Strine (94)                   | General      | United States  | 2007 | 29,828  | ≥25                     | Self-report | 1.20 | 1.10, 1.30 |      |    | 0     |
| Leboeuf-Yde (111)             | Twins        | Denmark        | 1998 | 29,424  | ≥25                     | Self-report | 1.27 | 1.18, 1.36 |      |    | 0     |
| Miranda (23)                  | Occupational | Finland        | 2008 | 3,609   | ≥25                     | Self-report | 1.29 | 1.14, 1.47 |      |    | 0     |
| Karahan (28)                  | Occupational | Turkey         | 2009 | 1,600   | ≥25                     | Self-report | 1.23 | 0.94, 1.62 |      |    | 0     |
| Raanaas (27)                  | Occupational | Norway         | 2008 | 801     | ≥25                     | Self-report | 1.05 | 0.80, 1.37 |      |    | 0     |
| Ozguler (32)                  | Occupational | France         | 2000 | 680     | >24.9                   | Self-report | 1.66 | 1.03, 2.68 |      |    | 0     |
| Wright (112)                  | General      | United Kingdom | 1995 | 24,000  | ≥25 m; ≥23.8 w          | Self-report | 1.30 | 1.23, 1.37 |      |    | 1     |
| Pooled                        |              |                |      | 93,358  |                         |             | 1.26 | 1.20, 1.32 | 0.26 | 20 | 0, 61 |
| Adjusted for publication bias |              |                |      |         |                         |             | 1.25 | 1.19, 1.32 |      |    |       |
| Adolescents                   |              |                |      |         |                         |             |      |            |      |    |       |
| Sjolie (113)                  | Children     | Norway         | 2004 | 88      | >20.4                   | Measured    | 3.40 | 1.20, 9.30 |      |    | 0     |
| Hestbaek (24)                 | Twins        | Denmark        | 2006 | 9,497   | Age and gender specific | Self-report | 1.15 | 0.99, 1.34 |      |    | 0     |
| Pooled (adults + adolescents) |              |                |      | 102,943 |                         |             | 1.25 | 1.18, 1.32 | 0.13 | 34 | 0, 67 |
| Adjusted for publication bias |              |                |      |         |                         |             | 1.24 | 1.17, 1.32 |      |    |       |
| Obesity                       |              |                |      |         |                         |             |      |            |      |    |       |
| Shiri (92)                    | General      | Finland        | 2008 | 2,515   | ≥30                     | Measured    | 1.28 | 0.95, 1.72 |      |    | 0     |
| Leino-Arjas (93)              | Occupational | Finland        | 2006 | 901     | ≥30                     | Measured    | 2.25 | 1.23, 4.12 |      |    | 0     |
| Leboeuf-Yde (111)             | Twins        | Denmark        | 1998 | 29,424  | >29                     | Self-report | 1.10 | 0.90, 1.30 |      |    | 0     |
| Miranda (23)                  | Occupational | Finland        | 2008 | 3,609   | ≥30                     | Self-report | 1.28 | 0.99, 1.64 |      |    | 0     |
| Karahan (28)                  | Occupational | Turkey         | 2009 | 1,600   | ≥30                     | Self-report | 1.17 | 0.62, 2.20 |      |    | 0     |
| Raanaas (27)                  | Occupational | Norway         | 2008 | 801     | ≥30                     | Self-report | 1.13 | 0.74, 1.72 |      |    | 0     |
| Wright (112)                  | General      | United Kingdom | 1995 | 24,000  | >29.9 m; >28.5 w        | Self-report | 1.55 | 1.40, 1.71 |      |    | 1     |
| Pooled                        |              |                |      | 62,850  |                         |             | 1.32 | 1.12, 1.56 | 0.02 | 60 | 9, 83 |
| Adolescents                   |              |                |      |         |                         |             |      |            |      |    |       |
| Hestbaek (24)                 | Twins        | Denmark        | 2006 | 9,497   | Age and gender specific | Self-report | 1.36 | 0.88, 2.10 |      |    | 0     |
| Pooled (adults + adolescents) |              |                |      | 72,347  |                         |             | 1.33 | 1.14, 1.54 | 0.03 | 54 | 0, 79 |

Abbreviations: BMI, body mass index; CI, confidence interval; m, men; OR, odds ratio; w, women.

**Table 2.** Association Between Overweight/Obesity and the Prevalence of Seeking Care for Low Back Pain or Chronic Low Back Pain (Cross-Sectional Studies)

| First Author<br>(Reference No.)  | Population   | Country        | Year | Sample,<br>No. | BMI                            |             | OR   | 95% CI     | Heterogeneity |                |           | Detection or<br>Attrition Bias |
|----------------------------------|--------------|----------------|------|----------------|--------------------------------|-------------|------|------------|---------------|----------------|-----------|--------------------------------|
|                                  |              |                |      |                | Cutpoint,<br>kg/m <sup>2</sup> | Tool Used   |      |            | P             | I <sup>2</sup> | 95%<br>CI |                                |
| Seeking care for low back pain   |              |                |      |                |                                |             |      |            |               |                |           |                                |
| Overweight                       |              |                |      |                |                                |             |      |            |               |                |           |                                |
| Calza (114)                      | General      | Italy          | 2008 | 115,019        | 25–29.9                        | Self-report | 1.32 | 1.24, 1.40 |               |                |           | 0                              |
| Wright (112) <sup>a</sup>        | General      | United Kingdom | 1995 | 24,000         | 25–29.9 m; 23.8–28.5 w         | Self-report | 1.24 | 1.14, 1.35 |               |                |           | 1                              |
| Leino-Arjas (108)                | General      | Finland        | 1998 | 7,544          | 24–26.9                        | Self-report | 1.29 | 1.08, 1.54 |               |                |           | 1                              |
| Pooled                           |              |                |      | 146,563        |                                |             | 1.29 | 1.23, 1.36 | 0.50          | 0              | 0, 90     |                                |
| Overweight or obesity            |              |                |      |                |                                |             |      |            |               |                |           |                                |
| Calza (114)                      | General      | Italy          | 2008 | 115,019        | ≥25                            | Self-report | 1.40 | 1.33, 1.47 |               |                |           | 0                              |
| Ozguler (32)                     | Occupational | France         | 2000 | 680            | >24.9                          | Self-report | 2.10 | 1.18, 3.72 |               |                |           | 0                              |
| Wright (112) <sup>a</sup>        | General      | United Kingdom | 1995 | 24,000         | ≥25 m; ≥23.8 w                 | Self-report | 1.35 | 1.26, 1.45 |               |                |           | 1                              |
| Leino-Arjas (108)                | General      | Finland        | 1998 | 7,544          | ≥24                            | Self-report | 1.42 | 1.25, 1.62 |               |                |           | 1                              |
| Pooled                           |              |                |      | 147,243        |                                |             | 1.39 | 1.33, 1.45 | 0.41          | 0              | 0, 85     |                                |
| Adjusted for<br>publication bias |              |                |      |                |                                |             | 1.38 | 1.32, 1.46 |               |                |           |                                |
| Obesity                          |              |                |      |                |                                |             |      |            |               |                |           |                                |
| Torres (115)                     | General      | United States  | 2006 | 6,038          | ≥30                            | Measured    | 1.50 | 1.20, 1.90 |               |                |           | 1                              |
| Calza (114)                      | General      | Italy          | 2008 | 115,019        | ≥30                            | Self-report | 1.56 | 1.43, 1.70 |               |                |           | 0                              |
| Wright (112) <sup>a</sup>        | General      | United Kingdom | 1995 | 24,000         | >29.9 m; >28.5 w               | Self-report | 1.59 | 1.40, 1.79 |               |                |           | 1                              |
| Pooled                           |              |                |      | 145,057        |                                |             | 1.56 | 1.46, 1.67 | 0.90          | 0              | 0, 90     |                                |
| Chronic low back pain            |              |                |      |                |                                |             |      |            |               |                |           |                                |
| Overweight                       |              |                |      |                |                                |             |      |            |               |                |           |                                |
| Adults                           |              |                |      |                |                                |             |      |            |               |                |           |                                |
| Björck-van Dijken (26)           | General      | Sweden         | 2008 | 5,798          | 25–29.0                        | Measured    | 1.17 | 0.97, 1.40 |               |                |           | 0                              |
| Leboeuf-Yde (111)                | Twins        | Denmark        | 1998 | 29,424         | 25–29.0                        | Self-report | 1.60 | 1.40, 1.80 |               |                |           | 0                              |
| Leclerc (22)                     | General      | France         | 2008 | 15,534         | 25–29.9                        | Self-report | 1.25 | 1.13, 1.39 |               |                |           | 0                              |
| Silva (31)                       | General      | Brazil         | 2004 | 3,182          | 25–29.9                        | Self-report | 1.12 | 0.50, 2.52 |               |                |           | 0                              |
| Pooled                           |              |                |      | 53,938         |                                |             | 1.33 | 1.11, 1.58 | 0.009         | 74             | 28, 91    |                                |
| Adolescents                      |              |                |      |                |                                |             |      |            |               |                |           |                                |
| Hestbaek (24)                    | Twins        | Denmark        | 2006 | 9,608          | 24–28.9                        | Self-report | 1.41 | 0.82, 2.43 |               |                |           | 0                              |
| Pooled<br>(adults + adolescents) |              |                |      | 63,546         |                                |             | 1.33 | 1.14, 1.56 | 0.02          | 66             | 11, 87    |                                |
| Overweight or obesity            |              |                |      |                |                                |             |      |            |               |                |           |                                |
| Adults                           |              |                |      |                |                                |             |      |            |               |                |           |                                |
| Björck-van Dijken (26)           | General      | Sweden         | 2008 | 5,798          | ≥25                            | Measured    | 1.22 | 1.05, 1.40 |               |                |           | 0                              |
| Leboeuf-Yde (111)                | Twins        | Denmark        | 1998 | 29,424         | ≥25                            | Self-report | 1.62 | 1.45, 1.80 |               |                |           | 0                              |
| Leclerc (22)                     | General      | France         | 2008 | 15,534         | ≥25                            | Self-report | 1.31 | 1.21, 1.43 |               |                |           | 0                              |
| Silva (31)                       | General      | Brazil         | 2004 | 3,182          | ≥25                            | Self-report | 1.34 | 0.75, 2.41 |               |                |           | 0                              |
| Ozguler (32)                     | Occupational | France         | 2000 | 680            | >24.9                          | Self-report | 1.64 | 0.83, 3.23 |               |                |           | 0                              |
| Pooled                           |              |                |      | 54,618         |                                |             | 1.39 | 1.20, 1.59 | 0.01          | 69             | 21, 88    |                                |

|                               |         |         |      |        |     |             |      |            |      |    |       |   |
|-------------------------------|---------|---------|------|--------|-----|-------------|------|------------|------|----|-------|---|
| Adolescents                   | Twins   | Denmark | 2006 | 9,608  | ≥24 | Self-report | 1.38 | 1.06, 1.79 | 0.02 | 62 | 6, 84 | 0 |
| Hestbaek (24)                 |         |         |      | 64,226 |     |             | 1.38 | 1.23, 1.56 |      |    |       |   |
| Pooled (adults + adolescents) |         |         |      |        |     |             |      |            |      |    |       |   |
| Obesity                       |         |         |      |        |     |             |      |            |      |    |       |   |
| Adults                        |         |         |      |        |     |             |      |            |      |    |       |   |
| Björck-van Dijken (26)        | General | Sweden  | 2008 | 5,798  | ≥30 | Measured    | 1.29 | 1.03, 1.62 |      |    |       | 0 |
| Leboeuf-Yde (111)             | Twins   | Denmark | 1998 | 29,424 | >29 | Self-report | 1.70 | 1.20, 2.20 |      |    |       | 0 |
| Leclerc (22)                  | General | France  | 2008 | 15,534 | ≥30 | Self-report | 1.44 | 1.24, 1.65 |      |    |       | 0 |
| Silva (31)                    | General | Brazil  | 2004 | 3,182  | ≥30 | Self-report | 1.63 | 0.70, 3.83 |      |    |       | 0 |
| Pooled                        |         |         |      | 53,938 |     |             | 1.44 | 1.28, 1.61 | 0.54 | 0  | 0, 85 |   |
| Adjusted for publication bias |         |         |      |        |     |             | 1.40 | 1.26, 1.55 |      |    |       |   |
| Adolescents                   |         |         |      |        |     |             |      |            |      |    |       |   |
| Hestbaek (24)                 | Twins   | Denmark | 2006 | 9,608  | ≥29 | Self-report | 1.01 | 0.41, 2.49 |      |    |       | 0 |
| Pooled (adults + adolescents) |         |         |      | 63,546 |     |             | 1.43 | 1.28, 1.60 | 0.60 | 0  | 0, 79 |   |

Abbreviations: BMI, body mass index; CI, confidence interval; m, men; OR, odds ratio; w, women.  
<sup>a</sup> Sample size is approximate.

*P* value or risk estimate ( $n = 16$ ) (54–69), reporting only an unadjusted *P* value ( $n = 4$ ) (70–73), reporting only unadjusted prevalence of low back pain in subgroups of BMI (74) or only mean BMI in those with or without low back pain (75), reporting only an age- and gender-adjusted *P* value (76) or averaged odds ratios for overweight/obesity (77), reporting an unadjusted odds ratio (78), and noncombinable studies because of using different cutpoints for BMI ( $n = 6$ ) (79–84). Finally, 33 studies qualified for the meta-analyses: 24 cross-sectional and 9 cohort (Tables 1–7).

### Cross-sectional studies

Of the 24 cross-sectional studies, 11 provided measured data for weight and 10 for height. In the other 13 studies, information on weight and height was gathered by self-reports. Three of 24 studies had moderate detection bias, and one had possible attrition bias.

The meta-analyses of cross-sectional studies showed a statistically significant association between BMI and low back pain (Tables 1, 2, and 6). Compared with those of normal BMI, overweight and obese people had a higher prevalence of low back pain in the past 12 months, seeking care for low back pain, and chronic low back pain. The prevalence of low back pain in the past month was also higher among the overweight/obese (BMI cutoff  $\geq 24$  kg/m<sup>2</sup> or  $\geq 27$  kg/m<sup>2</sup>) compared with those of normal BMI. The association was stronger for obesity than for overweight. Overweight and obesity had a stronger association with seeking care for low back pain or chronic low back pain than low back pain in the past month or past 12 months.

### Cohort studies

Of the 9 cohort studies, 3 provided measured data for weight and 2 for height. Four studies had possible attrition bias, and 1 study had both moderate detection and possible attrition bias.

The meta-analysis showed an association between obesity and the incidence of low back pain for at least a day in the past 12 months (pooled odds ratio = 1.53, 95% confidence interval: 1.22, 1.92) (Tables 3 and 6). Overweight was not associated with the incidence of low back pain. Overweight, but not obesity, was associated with sickness absence due to low-back disorder (pooled odds ratio = 1.35, 95% confidence interval: 1.02, 1.79) (Table 3).

### Gender-specific analyses

In cross-sectional studies, for women, both overweight and obesity were associated with an increased prevalence of back pain in the past 12 months, seeking care for low back pain, and chronic low back pain (Tables 4, 5, and 7). For men, overweight and obesity were convincingly associated with seeking care for low back pain and chronic low back pain. Overweight/obesity (BMI cutoff  $\geq 24$  kg/m<sup>2</sup> or  $\geq 27$  kg/m<sup>2</sup>) was also associated with low back pain in the past month among women.

In cohort studies, for both men and women, obesity, but not overweight, was associated with an increased incidence of low back pain in the past 12 months (Tables 4, 5, and 7).

**Table 3.** Association Between Overweight/Obesity and the Incidence of Low Back Pain (Cohort Studies)

| First Author<br>(Reference No.)     | Population   | Country        | Year | Sample,<br>No. | BMI                            |             | OR   | 95% CI     | Heterogeneity |                |           | Detection or<br>Attrition Bias |
|-------------------------------------|--------------|----------------|------|----------------|--------------------------------|-------------|------|------------|---------------|----------------|-----------|--------------------------------|
|                                     |              |                |      |                | Cutpoint,<br>kg/m <sup>2</sup> | Tool Used   |      |            | P             | I <sup>2</sup> | 95%<br>CI |                                |
| Low back pain in the past 12 months |              |                |      |                |                                |             |      |            |               |                |           |                                |
| Overweight                          |              |                |      |                |                                |             |      |            |               |                |           |                                |
| Adults                              |              |                |      |                |                                |             |      |            |               |                |           |                                |
| Leino-Arjas (93)                    | Occupational | Finland        | 2006 | 544            | 25–29.9                        | Measured    | 1.31 | 0.86, 1.98 |               |                |           | 0                              |
| Andersen (25)                       | Occupational | Denmark        | 2007 | 1,513          | 25–29.9                        | Self-report | 1.07 | 0.74, 1.54 |               |                |           | 0                              |
| Van Nieuwenhuysse (116)             | Occupational | Belgium        | 2009 | 322            | 25–29.9                        | Self-report | 0.72 | 0.25, 2.12 |               |                |           | 0                              |
| Miranda (23)                        | Occupational | Finland        | 2008 | 1,676          | 25–29.9                        | Self-report | 1.08 | 0.88, 1.33 |               |                |           | 1                              |
| Pooled                              |              |                |      | 4,055          |                                |             | 1.10 | 0.93, 1.30 | 0.72          | 0              | 0, 85     |                                |
| Overweight or obesity               |              |                |      |                |                                |             |      |            |               |                |           |                                |
| Adults                              |              |                |      |                |                                |             |      |            |               |                |           |                                |
| Leino-Arjas (93)                    | Occupational | Finland        | 2006 | 544            | ≥25                            | Measured    | 1.43 | 0.96, 2.13 |               |                |           | 0                              |
| Andersen (25)                       | Occupational | Denmark        | 2007 | 1,513          | ≥25                            | Self-report | 1.19 | 0.88, 1.61 |               |                |           | 0                              |
| Van Nieuwenhuysse (116)             | Occupational | Belgium        | 2009 | 322            | ≥25                            | Self-report | 1.56 | 0.80, 3.05 |               |                |           | 0                              |
| Lake (117)                          | General      | United Kingdom | 2000 | 2,773          | >70th percentile               | Self-report | 1.22 | 0.93, 1.61 |               |                |           | 1                              |
| Miranda (23)                        | Occupational | Finland        | 2008 | 1,676          | ≥25                            | Self-report | 1.15 | 0.97, 1.37 |               |                |           | 1                              |
| Pooled                              |              |                |      | 6,828          |                                |             | 1.21 | 1.07, 1.37 | 0.81          | 0              | 0, 79     |                                |
| Adjusted for<br>publication bias    |              |                |      |                |                                |             | 1.17 | 1.04, 1.32 |               |                |           |                                |
| Adolescents                         |              |                |      |                |                                |             |      |            |               |                |           |                                |
| Mustard (118)                       | Children     | Canada         | 2005 | 1,039          | ≥70th percentile               | Self-report | 1.08 | 0.69, 1.69 |               |                |           | 2                              |
| Pooled<br>(adults + adolescents)    |              |                |      | 7,867          |                                |             | 1.20 | 1.06, 1.35 | 0.87          | 0              | 0, 75     |                                |
| Adjusted for<br>publication bias    |              |                |      |                |                                |             | 1.19 | 1.06, 1.34 |               |                |           |                                |
| Obesity                             |              |                |      |                |                                |             |      |            |               |                |           |                                |
| Adults                              |              |                |      |                |                                |             |      |            |               |                |           |                                |
| Leino-Arjas (93)                    | Occupational | Finland        | 2006 | 544            | ≥30                            | Measured    | 2.35 | 1.03, 5.35 |               |                |           | 0                              |
| Andersen (25)                       | Occupational | Denmark        | 2007 | 1,513          | ≥30                            | Self-report | 1.48 | 0.87, 2.51 |               |                |           | 0                              |
| Van Nieuwenhuysse (116)             | Occupational | Belgium        | 2009 | 322            | ≥30                            | Self-report | 2.57 | 1.09, 6.09 |               |                |           | 0                              |
| Miranda (23)                        | Occupational | Finland        | 2008 | 1,676          | ≥30                            | Self-report | 1.34 | 0.98, 1.84 |               |                |           | 1                              |
| Pooled                              |              |                |      | 4,055          |                                |             | 1.53 | 1.18, 1.98 | 0.37          | 4              | 0, 85     |                                |
| Adjusted for<br>publication bias    |              |                |      |                |                                |             | 1.38 | 1.01, 1.90 |               |                |           |                                |



| Adolescents                   | Children     | Canada          | 2005 | 1,039 | >85th percentile                 | Self-report | 1.61 | 0.94, 2.76 | 0.53 | 0 | 0, 79 | 2 |
|-------------------------------|--------------|-----------------|------|-------|----------------------------------|-------------|------|------------|------|---|-------|---|
| Mustard (118)                 |              |                 |      |       |                                  |             | 1.53 | 1.22, 1.92 |      |   |       |   |
| Pooled (adults + adolescents) |              |                 |      | 5,094 |                                  |             |      |            |      |   |       |   |
| Adjusted for publication bias |              |                 |      |       |                                  |             | 1.43 | 1.13, 1.81 |      |   |       |   |
|                               |              |                 |      |       | Sickness absence ( $\geq 1$ day) |             |      |            |      |   |       |   |
| Overweight                    |              |                 |      |       |                                  |             |      |            |      |   |       |   |
| Hemingway (33)                | Occupational | United Kingdom  | 1999 | 4,886 | 25–29.9                          | Measured    | 1.33 | 0.96, 1.85 |      |   |       | 0 |
| van den Heuvel (119)          | Occupational | The Netherlands | 2004 | 629   | 25–29.9                          | Measured    | 1.41 | 0.82, 2.41 |      |   |       | 1 |
| Pooled                        |              |                 |      | 5,515 |                                  |             | 1.35 | 1.02, 1.79 | 0.85 |   |       |   |
| Adjusted for publication bias |              |                 |      |       |                                  |             | 1.33 | 1.03, 1.71 |      |   |       |   |
| Obesity                       |              |                 |      |       |                                  |             |      |            |      |   |       |   |
| Hemingway (33)                | Occupational | United Kingdom  | 1999 | 4,886 | $\geq 30$                        | Measured    | 0.99 | 0.63, 1.55 |      |   |       | 0 |
| van den Heuvel (119)          | Occupational | The Netherlands | 2004 | 629   | $\geq 30$                        | Measured    | 1.30 | 0.46, 3.62 |      |   |       | 1 |
| Pooled                        |              |                 |      | 5,515 |                                  |             | 1.03 | 0.68, 1.56 | 0.63 |   |       |   |
| Adjusted for publication bias |              |                 |      |       |                                  |             | 0.99 | 0.67, 1.45 |      |   |       |   |

Abbreviations: BMI, body mass index; CI, confidence interval; OR, odds ratio.

## Publication bias

The funnel plot of the 33 studies included in our meta-analysis of the association between overweight (14 studies) or obesity (19 studies) and any low back pain was asymmetrical (Figure 2). The results suggest that some medium-sized and small studies with negative or null findings were not published. Only Begg's test ( $P = 0.01$ ), but not Egger's test ( $P = 0.41$ ), showed evidence of publication bias. The trim and fill method imputed 7 missing studies.

In the design-specific analysis, the funnel plots for both cross-sectional and cohort studies were asymmetrical. However, neither Begg's ( $P = 0.15$ ) nor Egger's ( $P = 0.86$ ) tests showed evidence of publication bias for cross-sectional studies. Both Begg's ( $P = 0.076$ ) and Egger's ( $P = 0.057$ ) tests were significant for cohort studies. Three missing cross-sectional studies and 3 missing cohort studies were imputed by the trim and fill method.

## Sensitivity analysis

Adjusting for publication bias had little effect on pooled estimates (Tables 1–3). Doing so attenuated the association between only obesity and the incidence of low back pain. Cumulative meta-analyses showed that the pooled estimates were not affected by the small or low-quality studies. Moreover, results remained consistent when the meta-analyses were restricted to those studies that controlled the obtained odds ratios for physical workload and/or psychosocial factors (Table 6).

## Results of studies excluded from meta-analysis

Of 62 studies excluded from meta-analysis, 46 (33 cross-sectional and 13 cohort) showed no or minor selection bias. All cross-sectional studies except one (49), on recurrent low back pain, disabling low back pain, and seeking care for low back pain, showed a positive association between BMI or weight and low back pain (40, 41, 43, 45, 51, 62, 73). Of the remaining 25 cross-sectional studies on low back pain in the past month or past 12 months or chronic low back pain, 8 showed a positive association between BMI or weight and low back pain (46, 56, 74, 75, 77–79, 81). Seven studies reported a  $P$  value for the association between BMI or weight and low back pain in the past month or past 12 months; the pooled  $P$  value was not statistically significant for low back pain in the past month ( $P = 0.09$ , 5 studies) (46, 48, 70, 72, 82) or low back pain in the past 12 months ( $P = 0.33$ , 4 studies) (50, 70, 72, 76). Of 13 cohort studies excluded from meta-analysis, 3 showed a positive association (42, 44, 52) and 4 a nonsignificant association (64, 71, 83, 84). It was not possible to assess quantitatively the results of 10 cross-sectional and 6 cohort studies that did not report a  $P$  value, odds ratio, or even the prevalence/incidence of low back pain in the subgroups of BMI.

## DISCUSSION

This meta-analysis shows that both overweight and obesity increase the risk of low back pain. Overweight and

**Table 4.** Association Between Overweight/Obesity and Low Back Pain in Men

| First Author<br>(Reference No.)                              | Population   | Country        | Year | Sample,<br>No. | BMI                            |             | OR   | 95% CI     | Heterogeneity |                |           | Detection or<br>Attrition Bias |
|--------------------------------------------------------------|--------------|----------------|------|----------------|--------------------------------|-------------|------|------------|---------------|----------------|-----------|--------------------------------|
|                                                              |              |                |      |                | Cutpoint,<br>kg/m <sup>2</sup> | Tool Used   |      |            | P             | I <sup>2</sup> | 95%<br>CI |                                |
| Cross-sectional studies: low back pain in the past month     |              |                |      |                |                                |             |      |            |               |                |           |                                |
| Overweight or obesity<br>(BMI ≥24)                           |              |                |      |                |                                |             |      |            |               |                |           |                                |
| Croft (30)                                                   | General      | United Kingdom | 1994 | 3,905          | ≥24.7                          | Measured    | 0.99 | 0.82, 1.20 |               |                |           | 1                              |
| Leino-Arjas (108)                                            | General      | Finland        | 1998 | 3,629          | ≥24                            | Self-report | 1.12 | 0.98, 1.28 |               |                |           | 1                              |
| Matsui (107)                                                 | Occupational | Japan          | 1997 | 2,517          | >25                            | Self-report | 1.00 | 0.80, 1.20 |               |                |           | 1                              |
| Pooled                                                       |              |                |      | 10,051         |                                |             | 1.06 | 0.96, 1.65 | 0.48          | 0              | 0, 90     |                                |
| Overweight or obesity<br>(BMI ≥27)                           |              |                |      |                |                                |             |      |            |               |                |           |                                |
| Schneider (110)                                              | General      | Germany        | 2005 | 1,997          | ≥27.8                          | Measured    | 1.08 | 0.87, 1.34 |               |                |           | 0                              |
| Croft (30)                                                   | General      | United Kingdom | 1994 | 3,905          | >27.3                          | Measured    | 0.98 | 0.72, 1.35 |               |                |           | 1                              |
| Leino-Arjas (108)                                            | General      | Finland        | 1998 | 3,629          | ≥27                            | Self-report | 1.06 | 0.87, 1.29 |               |                |           | 1                              |
| Pooled                                                       |              |                |      | 9,531          |                                |             | 1.05 | 0.92, 1.20 | 0.87          | 0              | 0, 90     |                                |
| Cross-sectional studies: low back pain in the past 12 months |              |                |      |                |                                |             |      |            |               |                |           |                                |
| Overweight                                                   |              |                |      |                |                                |             |      |            |               |                |           |                                |
| Shiri (92)                                                   | General      | Finland        | 2008 | 1,157          | 25–29.9                        | Measured    | 0.79 | 0.57, 1.09 |               |                |           | 0                              |
| Leino-Arjas (93)                                             | Occupational | Finland        | 2006 | 608            | 25–29.9                        | Measured    | 1.51 | 0.96, 2.38 |               |                |           | 0                              |
| Hestbaek (24)                                                | Twins        | Denmark        | 2006 | 4,605          | Age specific                   | Self-report | 0.97 | 0.77, 1.22 |               |                |           | 0                              |
| Miranda (23)                                                 | Occupational | Finland        | 2008 | 2,678          | 25–29.9                        | Self-report | 1.16 | 0.98, 1.37 |               |                |           | 0                              |
| Raanaas (27)                                                 | Occupational | Norway         | 2008 | 686            | 25–29.9                        | Self-report | 0.85 | 0.59, 1.23 |               |                |           | 0                              |
| Karahan (28)                                                 | Occupational | Turkey         | 2009 | 500            | 25–29.9                        | Self-report | 1.41 | 0.95, 2.08 |               |                |           | 0                              |
| Pooled                                                       |              |                |      | 10,234         |                                |             | 1.06 | 0.89, 1.27 | 0.06          | 53             | 0, 81     |                                |
| Obesity                                                      |              |                |      |                |                                |             |      |            |               |                |           |                                |
| Shiri (92)                                                   | General      | Finland        | 2008 | 1,157          | ≥30                            | Measured    | 0.77 | 0.48, 1.23 |               |                |           | 0                              |
| Leino-Arjas (93)                                             | Occupational | Finland        | 2006 | 608            | ≥30                            | Measured    | 2.46 | 1.17, 5.16 |               |                |           | 0                              |
| Hestbaek (24)                                                | Twins        | Denmark        | 2006 | 4,605          | Age specific                   | Self-report | 1.29 | 0.63, 2.55 |               |                |           | 0                              |
| Miranda (23)                                                 | Occupational | Finland        | 2008 | 2,678          | ≥30                            | Self-report | 1.20 | 0.90, 1.60 |               |                |           | 0                              |
| Raanaas (27)                                                 | Occupational | Norway         | 2008 | 686            | ≥30                            | Self-report | 1.02 | 0.65, 1.58 |               |                |           | 0                              |
| Karahan (28)                                                 | Occupational | Turkey         | 2009 | 500            | ≥30                            | Self-report | 0.91 | 0.38, 2.16 |               |                |           | 0                              |
| Pooled                                                       |              |                |      | 10,234         |                                |             | 1.13 | 0.87, 1.47 | 0.18          | 34             | 0, 73     |                                |
| Cross-sectional studies: seeking care for low back pain      |              |                |      |                |                                |             |      |            |               |                |           |                                |
| Overweight                                                   |              |                |      |                |                                |             |      |            |               |                |           |                                |
| Mattila (120)                                                | Conscripts   | Finland        | 2008 | 7,040          | 25–29.9                        | Measured    | 1.10 | 0.90, 1.30 |               |                |           | 0                              |
| Calza (114)                                                  | General      | Italy          | 2008 | 55,303         | 25–29.9                        | Self-report | 1.26 | 1.15, 1.38 |               |                |           | 0                              |
| Pooled                                                       |              |                |      | 63,029         |                                |             | 1.21 | 1.06, 1.37 | 0.19          |                |           |                                |

|                                                            |              |                 |      |        |         |             |      |             |        |    |        |
|------------------------------------------------------------|--------------|-----------------|------|--------|---------|-------------|------|-------------|--------|----|--------|
| Overweight or obesity                                      |              |                 |      |        |         |             |      |             |        |    |        |
| Mattila (120)                                              | Conscripts   | Finland         | 2008 | 7,040  | ≥25     | Measured    | 1.01 | 0.86, 1.18  |        |    | 0      |
| Calza (114)                                                | General      | Italy           | 2008 | 55,303 | ≥25     | Self-report | 1.31 | 1.21, 1.41  |        |    | 0      |
| Leino-Arjas (108)                                          | General      | Finland         | 1998 | 3,915  | ≥24     | Self-report | 1.21 | 1.01, 1.45  |        |    | 1      |
| Pooled                                                     |              |                 |      | 66,258 |         |             | 1.18 | 1.00, 1.39  | 0.01   | 77 | 23, 93 |
| Obesity                                                    |              |                 |      |        |         |             |      |             |        |    |        |
| Mattila (120)                                              | Conscripts   | Finland         | 2008 | 7,040  | >30     | Measured    | 0.8  | 0.60, 1.10  |        |    | 0      |
| Calza (114)                                                | General      | Italy           | 2008 | 55,303 | ≥30     | Self-report | 1.42 | 1.24, 1.62  |        |    | 0      |
| Wright (112) <sup>a</sup>                                  | General      | United Kingdom  | 1995 | 10,600 | >29.9   | Self-report | 1.91 | 1.54, 2.35  |        |    | 1      |
| Pooled                                                     |              |                 |      |        |         |             | 1.32 | 0.89, 1.95  | <0.001 | 91 | 75, 96 |
| Leino-Arjas (108)                                          | General      | Finland         | 1998 | 3,915  | ≥27     | Self-report | 1.27 | 0.98, 1.65  |        |    | 1      |
| Pooled                                                     |              |                 |      | 76,858 |         |             | 1.31 | 0.98, 1.76  | <0.001 | 86 | 67, 94 |
| <i>Cross-sectional studies: chronic low back pain</i>      |              |                 |      |        |         |             |      |             |        |    |        |
| Overweight                                                 |              |                 |      |        |         |             |      |             |        |    |        |
| Björck-van Dijken (26)                                     | General      | Sweden          | 2008 | 2,850  | 25–29.9 | Measured    | 1.05 | 0.80, 1.39  |        |    | 0      |
| Leclerc (22)                                               | General      | France          | 2008 | 7,292  | 25–29.9 | Self-report | 1.21 | 1.05, 1.41  |        |    | 0      |
|                                                            |              |                 |      | 10,142 |         |             | 1.17 | 1.03, 1.34  | 0.37   |    |        |
| Obesity                                                    |              |                 |      |        |         |             |      |             |        |    |        |
| Björck-van Dijken (26)                                     | General      | Sweden          | 2008 | 2,850  | ≥30     | Measured    | 1.34 | 0.94, 1.90  |        |    | 0      |
| Leclerc (22)                                               | General      | France          | 2008 | 7,292  | ≥30     | Self-report | 1.24 | 1.00, 1.54  |        |    | 0      |
|                                                            |              |                 |      | 10,142 |         |             | 1.27 | 1.05, 1.52  | 0.71   |    |        |
| <i>Cohort studies: low back pain in the past 12 months</i> |              |                 |      |        |         |             |      |             |        |    |        |
| Overweight                                                 |              |                 |      |        |         |             |      |             |        |    |        |
| Leino-Arjas (93)                                           | Occupational | Finland         | 2006 | 353    | 25–29.9 | Measured    | 1.34 | 0.81, 2.22  |        |    | 0      |
| Andersen (25)                                              | Occupational | Denmark         | 2007 | 824    | 25–29.9 | Self-report | 0.81 | 0.49, 1.36  |        |    | 0      |
| Miranda (23)                                               | Occupational | Finland         | 2008 | 1,541  | 25–29.9 | Self-report | 1.33 | 1.02, 1.73  |        |    | 1      |
| Pooled                                                     |              |                 |      | 2,718  |         |             | 1.19 | 0.89, 1.58  | 0.22   | 34 | 0, 78  |
| Overweight or obesity                                      |              |                 |      |        |         |             |      |             |        |    |        |
| Leino-Arjas (93)                                           | Occupational | Finland         | 2006 | 353    | ≥25     | Measured    | 1.55 | 0.96, 2.50  |        |    | 0      |
| Andersen (25)                                              | Occupational | Denmark         | 2007 | 824    | ≥25     | Self-report | 0.95 | 0.60, 1.48  |        |    | 0      |
| Miranda (23)                                               | Occupational | Finland         | 2008 | 1,541  | ≥25     | Self-report | 1.30 | 1.03, 1.64  |        |    | 1      |
| Pooled                                                     |              |                 |      | 2,718  |         |             | 1.26 | 1.02, 1.56  | 0.31   | 13 | 0, 91  |
| Obesity                                                    |              |                 |      |        |         |             |      |             |        |    |        |
| Leino-Arjas (93)                                           | Occupational | Finland         | 2006 | 353    | ≥30     | Measured    | 4.23 | 1.44, 12.45 |        |    | 0      |
| Andersen (25)                                              | Occupational | Denmark         | 2007 | 824    | ≥30     | Self-report | 1.32 | 0.61, 2.86  |        |    | 0      |
| Miranda (23)                                               | Occupational | Finland         | 2008 | 1,541  | ≥30     | Self-report | 1.22 | 0.78, 1.93  |        |    | 1      |
| Elders (121)                                               | Occupational | The Netherlands | 2004 | 96     | ≥27     | Self-report | 1.97 | 0.91, 4.27  |        |    | 1      |
| Pooled                                                     |              |                 |      | 2,814  |         |             | 1.66 | 1.04, 2.63  | 0.17   | 39 | 0, 79  |

Abbreviations: BMI, body mass index; CI, confidence interval; OR, odds ratio.

<sup>a</sup> Sample size is approximate.

**Table 5.** Association Between Overweight/Obesity and Low Back Pain in Women

| First Author<br>(Reference No.)                              | Population   | Country        | Year | Sample,<br>No. | BMI                            |             | OR    | 95% CI      | Heterogeneity |                |           | Detection or<br>Attrition Bias |
|--------------------------------------------------------------|--------------|----------------|------|----------------|--------------------------------|-------------|-------|-------------|---------------|----------------|-----------|--------------------------------|
|                                                              |              |                |      |                | Cutpoint,<br>kg/m <sup>2</sup> | Tool Used   |       |             | P             | I <sup>2</sup> | 95%<br>CI |                                |
| Cross-sectional studies: low back pain in the past month     |              |                |      |                |                                |             |       |             |               |                |           |                                |
| Overweight or obesity<br>(BMI ≥24)                           |              |                |      |                |                                |             |       |             |               |                |           |                                |
| Erbay Dündar (122)                                           | General      | Turkey         | 2006 | 269            | >25                            | Measured    | 3.80  | 1.70, 8.30  |               |                |           | 0                              |
| Croft (30)                                                   | General      | United Kingdom | 1994 | 5,098          | ≥24.7                          | Measured    | 1.20  | 1.02, 1.41  |               |                |           | 1                              |
| Mutsui (107)                                                 | Occupational | Japan          | 1997 | 525            | >24                            | Self-report | 1.30  | 0.80, 2.20  |               |                |           | 0                              |
| Leino-Arjas (108)                                            | General      | Finland        | 1998 | 3,915          | ≥24                            | Self-report | 1.36  | 1.20, 1.55  |               |                |           | 1                              |
| Pooled                                                       |              |                |      | 9,807          |                                |             | 1.38  | 1.11, 1.72  | 0.03          | 64             | 0, 88     |                                |
| Overweight or obesity<br>(BMI ≥27)                           |              |                |      |                |                                |             |       |             |               |                |           |                                |
| Schneider (110)                                              | General      | Germany        | 2005 | 1,491          | ≥27.3                          | Measured    | 1.51  | 1.16, 1.95  |               |                |           | 0                              |
| Croft (30)                                                   | General      | United Kingdom | 1994 | 5,098          | >27.3                          | Measured    | 1.25  | 0.99, 1.58  |               |                |           | 1                              |
| Leino-Arjas (108)                                            | General      | Finland        | 1998 | 3,915          | ≥27                            | Self-report | 1.44  | 1.18, 1.75  |               |                |           | 1                              |
| Pooled                                                       |              |                |      | 10,504         |                                |             | 1.40  | 1.22, 1.59  | 0.52          | 0              | 0, 90     |                                |
| Cross-sectional studies: low back pain in the past 12 months |              |                |      |                |                                |             |       |             |               |                |           |                                |
| Overweight                                                   |              |                |      |                |                                |             |       |             |               |                |           |                                |
| Shiri (92)                                                   | General      | Finland        | 2008 | 1,358          | 25–29.9                        | Measured    | 1.17  | 0.86, 1.58  |               |                |           | 0                              |
| Leino-Arjas (93)                                             | Occupational | Finland        | 2006 | 293            | 25–29.9                        | Measured    | 1.02  | 0.52, 2.02  |               |                |           | 0                              |
| Hestbaek (24)                                                | Twins        | Denmark        | 2006 | 4,892          | Age specific                   | Self-report | 1.31  | 1.04, 1.66  |               |                |           | 0                              |
| Karahan (28)                                                 | Occupational | Turkey         | 2009 | 1,100          | 25–29.9                        | Self-report | 1.13  | 0.74, 1.71  |               |                |           | 0                              |
| Miranda (23)                                                 | Occupational | Finland        | 2008 | 931            | 25–29.9                        | Self-report | 1.92  | 1.40, 2.63  |               |                |           | 0                              |
| Raanaas (27)                                                 | Occupational | Norway         | 2008 | 115            | 25–29.9                        | Self-report | 2.94  | 1.12, 7.72  |               |                |           | 0                              |
| Pooled                                                       |              |                |      | 8,689          |                                |             | 1.38  | 1.10, 1.72  | 0.09          | 47             | 0, 79     |                                |
| Obesity                                                      |              |                |      |                |                                |             |       |             |               |                |           |                                |
| Shiri (92)                                                   | General      | Finland        | 2008 | 1,358          | ≥30                            | Measured    | 1.79  | 1.20, 2.67  |               |                |           | 0                              |
| Leino-Arjas (93)                                             | Occupational | Finland        | 2006 | 293            | ≥30                            | Measured    | 1.90  | 0.68, 5.37  |               |                |           | 0                              |
| Hestbaek (24)                                                | Twins        | Denmark        | 2006 | 4,892          | Age specific                   | Self-report | 1.41  | 0.81, 2.44  |               |                |           | 0                              |
| Karahan (28)                                                 | Occupational | Turkey         | 2009 | 1,100          | ≥30                            | Self-report | 1.65  | 0.60, 4.48  |               |                |           | 0                              |
| Miranda (23)                                                 | Occupational | Finland        | 2008 | 931            | ≥30                            | Self-report | 1.56  | 0.93, 2.61  |               |                |           | 0                              |
| Raanaas (27)                                                 | Occupational | Norway         | 2008 | 115            | ≥30                            | Self-report | 15.86 | 1.73, 145.0 |               |                |           | 0                              |
| Pooled                                                       |              |                |      | 8,689          |                                |             | 1.69  | 1.31, 2.18  | 0.47          | 0              | 0, 75     |                                |
| Cross-sectional studies: seeking care for low back pain      |              |                |      |                |                                |             |       |             |               |                |           |                                |
| Overweight or obesity                                        |              |                |      |                |                                |             |       |             |               |                |           |                                |
| Calza (114)                                                  | General      | Italy          | 2008 | 59,716         | ≥25                            | Self-report | 1.47  | 1.37, 1.57  |               |                |           | 0                              |
| Leino-Arjas (108)                                            | General      | Finland        | 1998 | 3,629          | ≥24                            | Self-report | 1.67  | 1.40, 2.00  |               |                |           | 1                              |
| Pooled                                                       |              |                |      | 63,345         |                                |             | 1.52  | 1.36, 1.71  | 0.19          |                |           |                                |

|                                                            |              |                 |      |        |         |             |      |            |       |    |        |
|------------------------------------------------------------|--------------|-----------------|------|--------|---------|-------------|------|------------|-------|----|--------|
| Obesity                                                    |              |                 |      |        |         |             |      |            |       |    |        |
| Calza (114)                                                | General      | Italy           | 2008 | 59,716 | ≥30     | Self-report | 1.67 | 1.49, 1.87 |       |    | 0      |
| Wright (112) <sup>a</sup>                                  | General      | United Kingdom  | 1995 | 13,400 | >28.5   | Self-report | 1.40 | 1.20, 1.63 |       |    | 1      |
| Leino-Arjas (108)                                          | General      | Finland         | 1998 | 3,629  | ≥27     | Self-report | 1.98 | 1.52, 2.58 |       |    | 1      |
| Pooled                                                     |              |                 |      | 76,745 |         |             | 1.63 | 1.38, 1.92 | 0.05  | 66 | 0, 90  |
| <i>Cross-sectional studies: chronic low back pain</i>      |              |                 |      |        |         |             |      |            |       |    |        |
| Overweight                                                 |              |                 |      |        |         |             |      |            |       |    |        |
| Björck-van Dijken (26)                                     | General      | Sweden          | 2008 | 2,948  | 25–29.9 | Measured    | 1.27 | 0.99, 1.63 |       |    | 0      |
| Leclerc (22)                                               | General      | France          | 2008 | 8,242  | 25–29.9 | Self-report | 1.29 | 1.12, 1.49 |       |    | 0      |
| Pooled                                                     |              |                 |      | 11,190 |         |             | 1.29 | 1.13, 1.46 | 0.91  |    |        |
| Overweight or obesity                                      |              |                 |      |        |         |             |      |            |       |    |        |
| Wijnhoven (123)                                            | General      | The Netherlands | 2006 | 11,428 | >25     | Measured    | 1.01 | 0.87, 1.18 |       |    | 0      |
| Björck-van Dijken (26)                                     | General      | Sweden          | 2008 | 2,948  | ≥25     | Measured    | 1.27 | 1.04, 1.53 |       |    | 0      |
| Leclerc (22)                                               | General      | France          | 2008 | 8,242  | ≥25     | Self-report | 1.40 | 1.25, 1.57 |       |    | 0      |
| Pooled                                                     |              |                 |      | 22,618 |         |             | 1.22 | 0.99, 1.50 | 0.003 | 82 | 46, 94 |
| Obesity                                                    |              |                 |      |        |         |             |      |            |       |    |        |
| Björck-van Dijken (26)                                     | General      | Sweden          | 2008 | 2,948  | ≥30     | Measured    | 1.26 | 0.94, 1.69 |       |    | 0      |
| Leclerc (22)                                               | General      | France          | 2008 | 8,242  | ≥30     | Self-report | 1.60 | 1.33, 1.93 |       |    | 0      |
| Pooled                                                     |              |                 |      | 11,190 |         |             | 1.46 | 1.16, 1.84 | 0.17  |    |        |
| <i>Cohort studies: low back pain in the past 12 months</i> |              |                 |      |        |         |             |      |            |       |    |        |
| Overweight                                                 |              |                 |      |        |         |             |      |            |       |    |        |
| Leino-Arjas (93)                                           | Occupational | Finland         | 2006 | 191    | 25–29.9 | Measured    | 1.24 | 0.60, 2.59 |       |    | 0      |
| Andersen (25)                                              | Occupational | Denmark         | 2007 | 824    | 25–29.9 | Self-report | 1.43 | 0.85, 2.39 |       |    | 0      |
| Miranda (23)                                               | Occupational | Finland         | 2008 | 538    | 25–29.9 | Self-report | 0.64 | 0.36, 1.13 |       |    | 1      |
| Pooled                                                     |              |                 |      | 1,553  |         |             | 1.04 | 0.62, 1.74 | 0.10  | 55 | 0, 87  |
| Overweight or obesity                                      |              |                 |      |        |         |             |      |            |       |    |        |
| Leino-Arjas (93)                                           | Occupational | Finland         | 2006 | 191    | ≥25     | Measured    | 1.21 | 0.60, 2.46 |       |    | 0      |
| Andersen (25)                                              | Occupational | Denmark         | 2007 | 824    | ≥25     | Self-report | 1.50 | 0.98, 2.80 |       |    | 0      |
| Power (124)                                                | General      | United Kingdom  | 2001 | 2,273  | >24.9   | Self-report | 1.78 | 1.07, 2.95 |       |    | 1      |
| Miranda (23)                                               | Occupational | Finland         | 2008 | 538    | ≥25     | Self-report | 0.79 | 0.50, 1.26 |       |    | 1      |
| Pooled                                                     |              |                 |      | 3,826  |         |             | 1.25 | 0.85, 1.84 | 0.10  | 51 | 0, 84  |
| Obesity                                                    |              |                 |      |        |         |             |      |            |       |    |        |
| Leino-Arjas (93)                                           | Occupational | Finland         | 2006 | 191    | ≥30     | Measured    | 1.05 | 0.30, 3.77 |       |    | 0      |
| Andersen (25)                                              | Occupational | Denmark         | 2007 | 824    | ≥30     | Self-report | 1.64 | 0.80, 3.36 |       |    | 0      |
| Miranda (23)                                               | Occupational | Finland         | 2008 | 538    | ≥30     | Self-report | 1.21 | 0.54, 2.71 |       |    | 1      |
| Pooled                                                     |              |                 |      | 1,553  |         |             | 1.37 | 0.83, 2.24 | 0.77  | 0  | 0, 90  |

Abbreviations: BMI, body mass index; CI, confidence interval; OR, odds ratio.

<sup>a</sup> Sample size is approximate.

**Table 6.** Summary Pooled Odds Ratios of Low Back Pain for Overweight and Obesity<sup>a</sup>

|                                             | All            |                                    |             |      |            | Studies That Controlled for Potential Confounders <sup>b</sup> |                     |             |      |            |
|---------------------------------------------|----------------|------------------------------------|-------------|------|------------|----------------------------------------------------------------|---------------------|-------------|------|------------|
|                                             | No. of Studies | Reference Nos.                     | Sample, No. | OR   | 95% CI     | No. of Studies                                                 | Reference Nos.      | Sample, No. | OR   | 95% CI     |
| <i>Prevalence (cross-sectional studies)</i> |                |                                    |             |      |            |                                                                |                     |             |      |            |
| Low back pain in the past month             |                |                                    |             |      |            |                                                                |                     |             |      |            |
| Overweight or obesity (BMI $\geq 24$ )      | 4              | 30, 107–109                        | 20,965      | 1.16 | 1.05, 1.27 |                                                                |                     |             |      |            |
| Overweight or obesity (BMI $\geq 27$ )      | 3              | 30, 108, 110                       | 20,035      | 1.22 | 1.11, 1.34 | 2                                                              | 108, 110            | 16,547      | 1.24 | 1.11, 1.38 |
| Low back pain in the past 12 months         |                |                                    |             |      |            |                                                                |                     |             |      |            |
| Overweight                                  | 8              | 23, 24, 27, 28, 92, 93, 111, 112   | 72,347      | 1.22 | 1.14, 1.29 | 4                                                              | 23, 27, 28, 112     | 30,010      | 1.21 | 1.14, 1.29 |
| Overweight or obesity                       | 11             | 23, 24, 27, 28, 32, 92–94, 111–113 | 102,943     | 1.25 | 1.18, 1.32 | 5                                                              | 23, 27, 28, 32, 112 | 30,690      | 1.29 | 1.23, 1.36 |
| Obesity                                     | 8              | 23, 24, 27, 28, 92, 93, 111, 112   | 72,347      | 1.33 | 1.14, 1.54 | 4                                                              | 23, 27, 28, 112     | 30,010      | 1.41 | 1.21, 1.64 |
| Seeking care for low back pain              |                |                                    |             |      |            |                                                                |                     |             |      |            |
| Overweight                                  | 3              | 108, 112, 114                      | 146,563     | 1.29 | 1.23, 1.36 | 2                                                              | 108, 112            | 31,544      | 1.25 | 1.15, 1.35 |
| Overweight or obesity                       | 4              | 32, 108, 112, 114                  | 147,243     | 1.39 | 1.33, 1.45 | 3                                                              | 32, 108, 112        | 32,224      | 1.38 | 1.27, 1.51 |
| Obesity                                     | 3              | 112, 114, 115                      | 145,057     | 1.56 | 1.46, 1.67 |                                                                |                     |             |      |            |
| Chronic low back pain                       |                |                                    |             |      |            |                                                                |                     |             |      |            |
| Overweight                                  | 5              | 22, 24, 26, 31, 111                | 63,546      | 1.33 | 1.14, 1.56 | 3                                                              | 22, 26, 31          | 24,514      | 1.23 | 1.12, 1.35 |
| Overweight or obesity                       | 6              | 22, 24, 26, 31, 32, 111            | 64,226      | 1.38 | 1.23, 1.56 | 4                                                              | 22, 26, 31, 32      | 25,194      | 1.29 | 1.20, 1.39 |
| Obesity                                     | 5              | 22, 24, 26, 31, 111                | 63,546      | 1.43 | 1.28, 1.60 | 3                                                              | 22, 26, 31          | 24,514      | 1.40 | 1.24, 1.58 |
| <i>Incidence (cohort studies)</i>           |                |                                    |             |      |            |                                                                |                     |             |      |            |
| Low back pain in the past 12 months         |                |                                    |             |      |            |                                                                |                     |             |      |            |
| Overweight                                  | 4              | 23, 25, 93, 116                    | 4,055       | 1.10 | 0.93, 1.30 | 2                                                              | 23, 25              | 3,189       | 1.08 | 0.90, 1.29 |
| Overweight or obesity                       | 6              | 23, 25, 93, 116–118                | 7,867       | 1.20 | 1.06, 1.35 | 4                                                              | 23, 25, 117, 118    | 7,001       | 1.17 | 1.03, 1.32 |
| Obesity                                     | 5              | 23, 25, 93, 116, 118               | 5,094       | 1.53 | 1.22, 1.92 | 3                                                              | 23, 25, 118         | 4,228       | 1.42 | 1.11, 1.81 |
| Sickness absence ( $\geq 1$ day)            |                |                                    |             |      |            |                                                                |                     |             |      |            |
| Overweight                                  | 2              | 33, 119                            | 5,515       | 1.35 | 1.02, 1.79 |                                                                |                     |             |      |            |
| Obesity                                     | 2              | 33, 119                            | 5,515       | 1.03 | 0.68, 1.56 |                                                                |                     |             |      |            |

Abbreviations: BMI, body mass index; CI, confidence interval; OR, odds ratio.

<sup>a</sup> Overweight was defined as a BMI of 25–29.9 kg/m<sup>2</sup>, obesity as a BMI of  $\geq 30$  kg/m<sup>2</sup>, and overweight and obesity combined as a BMI of  $\geq 25$  kg/m<sup>2</sup>.<sup>b</sup> Studies that controlled the obtained estimates for at least age, gender, physical workload factors, and/or psychosocial factors.

**Table 7.** Summary Gender-specific Pooled Odds Ratios of Low Back Pain for Overweight and Obesity<sup>a</sup>

|                                             | Males          |                        |             |      |            | Females        |                        |             |      |            |
|---------------------------------------------|----------------|------------------------|-------------|------|------------|----------------|------------------------|-------------|------|------------|
|                                             | No. of Studies | Reference Nos.         | Sample, No. | OR   | 95% CI     | No. of Studies | Reference Nos.         | Sample, No. | OR   | 95% CI     |
| <i>Prevalence (cross-sectional studies)</i> |                |                        |             |      |            |                |                        |             |      |            |
| Low back pain in the past month             |                |                        |             |      |            |                |                        |             |      |            |
| Overweight or obesity (BMI $\geq 24$ )      | 3              | 30, 107, 108           | 10,051      | 1.06 | 0.96, 1.65 | 4              | 30, 107, 108, 122      | 9,807       | 1.38 | 1.11, 1.72 |
| Overweight or obesity (BMI $\geq 27$ )      | 3              | 30, 108, 110           | 9,531       | 1.05 | 0.92, 1.20 | 3              | 30, 108, 110           | 10,504      | 1.40 | 1.22, 1.59 |
| Low back pain in the past 12 months         |                |                        |             |      |            |                |                        |             |      |            |
| Overweight                                  | 6              | 23, 24, 27, 28, 92, 93 | 10,234      | 1.06 | 0.89, 1.27 | 6              | 23, 24, 27, 28, 92, 93 | 8,689       | 1.38 | 1.10, 1.72 |
| Obesity                                     | 6              | 23, 24, 27, 28, 92, 93 | 10,234      | 1.13 | 0.87, 1.47 | 6              | 23, 24, 27, 28, 92, 93 | 8,689       | 1.69 | 1.31, 2.18 |
| Seeking care for low back pain              |                |                        |             |      |            |                |                        |             |      |            |
| Overweight                                  | 2              | 114, 120               | 63,029      | 1.21 | 1.06, 1.37 |                |                        |             |      |            |
| Overweight or obesity                       | 3              | 108, 114, 120          | 66,258      | 1.18 | 1.00, 1.39 | 2              | 108, 114               | 63,345      | 1.52 | 1.36, 1.71 |
| Obesity                                     | 4              | 108, 112, 114, 120     | 76,858      | 1.31 | 0.98, 1.76 | 3              | 108, 112, 114          | 76,745      | 1.63 | 1.38, 1.92 |
| Chronic low back pain                       |                |                        |             |      |            |                |                        |             |      |            |
| Overweight                                  | 2              | 22, 26                 | 10,142      | 1.17 | 1.03, 1.34 | 2              | 22, 26                 | 11,190      | 1.29 | 1.13, 1.46 |
| Obesity                                     | 2              | 22, 26                 | 10,142      | 1.27 | 1.05, 1.52 | 2              | 22, 26                 | 11,190      | 1.46 | 1.16, 1.84 |
| <i>Incidence (cohort studies)</i>           |                |                        |             |      |            |                |                        |             |      |            |
| Low back pain in the past 12 months         |                |                        |             |      |            |                |                        |             |      |            |
| Overweight                                  | 3              | 23, 25, 93             | 2,718       | 1.19 | 0.89, 1.58 | 3              | 23, 25, 93             | 1,553       | 1.04 | 0.62, 1.74 |
| Overweight or obesity                       | 3              | 23, 25, 93             | 2,718       | 1.26 | 1.02, 1.56 | 4              | 23, 25, 93, 124        | 3,826       | 1.25 | 0.85, 1.84 |
| Obesity                                     | 4              | 23, 25, 93, 121        | 2,814       | 1.66 | 1.04, 2.63 | 3              | 23, 25, 93             | 1,553       | 1.37 | 0.83, 2.24 |

Abbreviations: BMI, body mass index; CI, confidence interval; OR, odds ratio.

<sup>a</sup> Overweight was defined as a BMI of 25–29.9 kg/m<sup>2</sup>, obesity as a BMI of  $\geq 30$  kg/m<sup>2</sup>, and overweight and obesity combined as BMI  $\geq 25$  kg/m<sup>2</sup>.

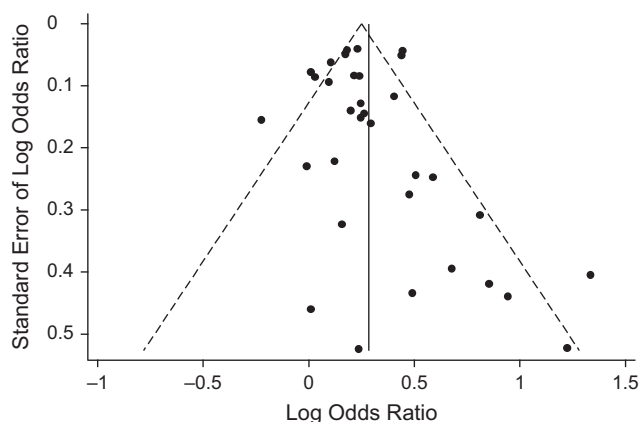

**Figure 2.** Funnel plot with pseudo 95% confidence limits for publication bias in studies of the association between overweight (14 studies) or obesity (19 studies) and low back pain.

obesity have the strongest association with seeking care for low back pain and chronic low back pain.

Most of the studies included in the meta-analysis controlled the obtained estimates for potential confounders, such as physical or psychosocial workload factors. Therefore, the observed association between overweight/obesity and low back pain is less likely due to potential confounders.

Our findings suggest that the association between overweight or obesity and the prevalence of low back pain is stronger for women than for men. The gender difference was less evident regarding the prevalence of seeking care for low back pain and chronic low back pain. Furthermore, we found no clear difference in the association between overweight or obesity and the incidence of low back pain in the cohort studies. The gender-related differences in the association of overweight or obesity with low back pain could be due to hormone-related obesity and associated changes in pain sensitivity (85). In addition, the association between overweight/obesity and low back pain could be related to differences in the distribution of body fat mass or to proportion of lean body mass (86). In men, high BMI may reflect high muscle mass; in women, it may indicate amount of adipose tissue. The slight gender difference in the association between obesity and the incidence of low back pain can be due to the small sample size of studies included in the gender-specific meta-analyses.

The reviewed studies had some major limitations. In many studies, the outcomes did not include information on the frequency and severity of low back pain. Different recall periods and different case definitions of low back pain were used. A limited number of prospective studies on the role of overweight/obesity in low back pain have been published. Furthermore, studies have used different cutpoints for overweight and obesity. Some did not use the World Health Organization–recommended BMI cutpoints to define overweight and obesity, defining overweight/obesity as a BMI of  $>24 \text{ kg/m}^2$  and obesity as a BMI of  $>27 \text{ kg/m}^2$  or  $>28.5 \text{ kg/m}^2$ . These differences in the classification of overweight or obesity may have led to underestimation of

the strength of the association between overweight or obesity and low back pain.

We excluded studies on clinical populations and case-control studies that included clinical controls because clinical populations are usually selected in many ways that are difficult to control for. To avoid selection bias, we also excluded studies with a response rate of less than 60% ( $n = 50$ ) or not reported ( $n = 12$ ). Scrutiny of studies excluded from the meta-analysis showed that most of those that reported a quantitative result showed a positive association or a tendency for a positive association between BMI or weight and low back pain, supporting the results of our meta-analysis.

There may be a publication bias in favor of positive results between obesity and low back pain. Publication bias arises when studies showing a statistically significant positive association are more likely to be reported or published than studies with a negative or null association. Publication bias is more likely to affect small studies, which tend to show larger risk estimates than larger studies. Funnel plot asymmetry may be caused by a number of factors other than publication bias (38). Statistical methods for the assessment of publication bias are unable to distinguish publication bias from other causes of funnel plot asymmetry (87). In our meta-analyses, adjusting for publication bias had very little effect on the pooled estimates.

The majority of the reviewed studies were cross-sectional. Therefore, the association between obesity and low back pain could be bidirectional; that is, obesity may cause low back pain, or obesity can be a consequence of low back pain. Obesity is more likely in people who are sedentary during work or leisure activities. Low back pain could also lead to physical inactivity and hence to increased adiposity. Obesity and low back pain could also be comorbid conditions that share common risk factors.

The association between obesity and low back pain may be causal, since we observed it in both cross-sectional and cohort studies. Several possible mechanisms can explain this association. First, obesity could increase the mechanical load on the spine by causing a higher compressive force or increased shear on the lumbar spine structures during various activities. Obese people may also be more liable to incur accidental injuries (88). Second, obesity may cause low back pain through systemic chronic inflammation. Obesity is associated with increased production of cytokines and acute-phase reactants and with activation of proinflammatory pathways (89), which, in turn, may lead to pain (90). Third, population-based studies have shown a stronger association of abdominal obesity than generalized obesity with low back pain (91, 92). Other studies have reported the associations of hypertension and dyslipidemia with low back pain (93, 94). The metabolic syndrome may be involved in the pathomechanical pathway of low back pain because abdominal obesity, hypertension, and dyslipidemia are its components.

Fourth, obesity is associated with disc degeneration (95) and vertebral endplate (Modic) changes (96). Spinal mobility decreases with increasing body weight (97), which may interfere with disc nutrition. Obese people have increased serum levels of triglycerides and low density lipoprotein cholesterol and decreased levels of high density lipoprotein cholesterol



(98). Dyslipidemia plays a major role in the development of atherosclerosis in obese individuals (98). Atherosclerosis could cause malnutrition of the disc cells (99, 100), which may predispose to disc degeneration. People with severe disc degeneration are more likely to have low back pain (101).

There is little information on the prevention of low back pain with weight reduction via lifestyle modification. Among working subjects with hypertension, a lifestyle intervention did not affect low back pain in the total study group, even though it had significant favorable effects on weight, BMI, and physical activity (102). However, among those with jobs involving moderately heavy or heavy work, the lifestyle intervention reduced low back pain. There is also preliminary evidence that weight reduction after bariatric surgery may result in recovery from low back pain (103–106).

In summary, this meta-analysis shows that overweight and obesity are associated with an increased risk of low back pain. The association is strongest for seeking care for low back pain and chronic low back pain. Our study suggests that obesity is a potentially modifiable risk factor for low back pain. However, well-conducted prospective studies, including intervention studies, are needed to confirm our findings.

## ACKNOWLEDGMENTS

Author affiliations: Team of Work-related Disorders, Centre of Expertise for Health and Work Ability, Finnish Institute of Occupational Health, Helsinki, Finland (Rahman Shiri, Jaro Karppinen, Päivi Leino-Arjas, Svetlana Solovieva, Eira Viikari-Juntura); and Department of Physical Medicine and Rehabilitation, University of Oulu, Oulu, Finland (Jaro Karppinen).

The authors thank Helena Liira for her contribution to the Medline searches and the selection of relevant studies. They also thank Johan Hviid Andersen, Christina Björck-van Dijken, Lise Hestbæk, Annette Leclerc, Helena Miranda, and Ruth Kjærsti Raanaas for supplying additional results and Azize Karahan for providing the data.

Conflict of interest: none declared.

## REFERENCES

- Haslam DW, James WP. Obesity. *Lancet*. 2005;366(9492):1197–1209.
- Brooks PM. The burden of musculoskeletal disease—a global perspective. *Clin Rheumatol*. 2006;25(6):778–781.
- Andersson GB. Epidemiological features of chronic low-back pain. *Lancet*. 1999;354(9178):581–585.
- McBeth J, Jones K. Epidemiology of chronic musculoskeletal pain. *Best Pract Res Clin Rheumatol*. 2007;21(3):403–425.
- Louw QA, Morris LD, Grimmer-Somers K. The prevalence of low back pain in Africa: a systematic review [electronic article]. *BMC Musculoskelet Disord*. 2007;8:105.
- Altinel L, Köse KC, Ergun V, et al. The prevalence of low back pain and risk factors among adult population in Afyon region, Turkey [in Turkish]. *Acta Orthop Traumatol Turc*. 2008;42(5):328–333.
- Freburger JK, Holmes GM, Agans RP, et al. The rising prevalence of chronic low back pain. *Arch Intern Med*. 2009;169(3):251–258.
- Hakala P, Rimpelä A, Salminen JJ, et al. Back, neck, and shoulder pain in Finnish adolescents: national cross sectional surveys. *BMJ*. 2002;325(7367):743–745.
- Garzillo MJ, Garzillo TA. Does obesity cause low back pain? *J Manipulative Physiol Ther*. 1994;17(9):601–604.
- Mirtz TA, Greene L. Is obesity a risk factor for low back pain? An example of using the evidence to answer a clinical question [electronic article]. *Chiropr Osteopat*. 2005;13(1):2.
- Jones GT, Macfarlane GJ. Epidemiology of low back pain in children and adolescents. *Arch Dis Child*. 2005;90(3):312–316.
- Hooper MM. Tending to the musculoskeletal problems of obesity. *Cleve Clin J Med*. 2006;73(9):839–845.
- Janke EA, Collins A, Kozak AT. Overview of the relationship between pain and obesity: what do we know? Where do we go next? *J Rehabil Res Dev*. 2007;44(2):245–262.
- Leboeuf-Yde C. Body weight and low back pain. A systematic literature review of 56 journal articles reporting on 65 epidemiologic studies. *Spine (Phila Pa 1976)*. 2000;25(2):226–237.
- Viikari-Juntura E, Shiri R, Solovieva S, et al. Risk factors of atherosclerosis and shoulder pain—is there an association? A systematic review. *Eur J Pain*. 2008;12(4):412–426.
- Shiri R, Karppinen J, Leino-Arjas P, et al. Cardiovascular and lifestyle risk factors in lumbar radicular pain or clinically defined sciatica: a systematic review. *Eur Spine J*. 2007;16(12):2043–2054.
- Shiri R, Karppinen J, Leino-Arjas P, et al. The association between smoking and low back pain: a meta-analysis. *Am J Med*. In press.
- Higgins JP, Green S, eds. *Cochrane Handbook for Systematic Reviews of Interventions 4.2.6 [updated September 2006]*. Chichester, United Kingdom: John Wiley & Sons, Ltd; 2006. (<http://www.cochrane.org/resources/handbook/hbook.htm>). (Accessed November 19, 2009).
- World Health Organization. *Physical Status: The Use and Interpretation of Anthropometry. Report of a WHO Expert Committee*. Geneva, Switzerland: WHO; 1995. (WHO technical report series 854).
- WHO Expert Consultation. Appropriate body-mass index for Asian populations and its implications for policy and intervention strategies. *Lancet*. 2004;363(9403):157–163.
- Cole TJ, Bellizzi MC, Flegal KM, et al. Establishing a standard definition for child overweight and obesity worldwide: international survey. *BMJ*. 2000;320(7244):1240–1243.
- Leclerc A, Gourmelen J, Chastang JF, et al. Level of education and back pain in France: the role of demographic, lifestyle and physical work factors. *Int Arch Occup Environ Health*. 2008;82(5):643–652.
- Miranda H, Viikari-Juntura E, Punnett L, et al. Occupational loading, health behavior and sleep disturbance as predictors of low-back pain. *Scand J Work Environ Health*. 2008;34(6):411–419.
- Hestbæk L, Leboeuf-Yde C, Kyvik KO. Are lifestyle-factors in adolescence predictors for adult low back pain? A cross-sectional and prospective study of young twins [electronic article]. *BMC Musculoskelet Disord*. 2006;7:27.
- Andersen JH, Haahr JP, Frost P. Risk factors for more severe regional musculoskeletal symptoms: a two-year prospective study of a general working population. *Arthritis Rheum*. 2007;56(4):1355–1364.

26. Björck-van Dijken C, Fjellman-Wiklund A, Hildingsson C. Low back pain, lifestyle factors and physical activity: a population based study. *J Rehabil Med*. 2008;40(10):864–869.
27. Raanaas RK, Anderson D. A questionnaire survey of Norwegian taxi drivers' musculoskeletal health, and work-related risk factors. *Int J Industr Ergonom*. 2008;38:280–290.
28. Karahan A, Kav S, Abbasoglu A, et al. Low back pain: prevalence and associated risk factors among hospital staff. *J Adv Nurs*. 2009;65(3):516–524.
29. Griffith LE, Hogg-Johnson S, Cole DC, et al. Low-back pain definitions in occupational studies were categorized for a meta-analysis using Delphi consensus methods. *J Clin Epidemiol*. 2007;60(6):625–633.
30. Croft PR, Rigby AS. Socioeconomic influences on back problems in the community in Britain. *J Epidemiol Community Health*. 1994;48(2):166–170.
31. Silva MC, Fassa AG, Valle NC. Chronic low back pain in a Southern Brazilian adult population: prevalence and associated factors [in Portuguese]. *Cad Saude Publica*. 2004;20(2):377–385.
32. Ozguler A, Leclerc A, Landre MF, et al. Individual and occupational determinants of low back pain according to various definitions of low back pain. *J Epidemiol Community Health*. 2000;54(3):215–220.
33. Hemingway H, Shipley M, Stansfeld S, et al. Are risk factors for atherothrombotic disease associated with back pain sickness absence? The Whitehall II Study. *J Epidemiol Community Health*. 1999;53(4):197–203.
34. Petitti DB. Approaches to heterogeneity in meta-analysis. *Stat Med*. 2001;20(23):3625–3633.
35. Ioannidis JP, Patsopoulos NA, Evangelou E. Uncertainty in heterogeneity estimates in meta-analyses. *BMJ*. 2007;335(7626):914–916.
36. Lau J, Ioannidis JP, Schmid CH. Quantitative synthesis in systematic reviews. *Ann Intern Med*. 1997;127(9):820–826.
37. Begg CB, Mazumdar M. Operating characteristics of a rank correlation test for publication bias. *Biometrics*. 1994;50(4):1088–1101.
38. Egger M, Davey Smith G, Schneider M, et al. Bias in meta-analysis detected by a simple, graphical test. *BMJ*. 1997;315(7109):629–634.
39. Duval S, Tweedie R. Trim and fill: a simple funnel-plot-based method of testing and adjusting for publication bias in meta-analysis. *Biometrics*. 2000;56(2):455–463.
40. Andrianakos A, Trontzas P, Christoyannis F, et al. Prevalence of rheumatic diseases in Greece: a cross-sectional population based epidemiological study. The ESORDIG Study. *J Rheumatol*. 2003;30(7):1589–1601.
41. Hagen KB, Tambs K, Bjerkedal T. A prospective cohort study of risk factors for disability retirement because of back pain in the general working population. *Spine (Phila Pa 1976)*. 2002;27(16):1790–1796.
42. Mattila VM, Saarni L, Parkkari J, et al. Predictors of low back pain hospitalization—a prospective follow-up of 57,408 adolescents. *Pain*. 2008;139(1):209–217.
43. Mikkelsen LO, Nupponen H, Kaprio J, et al. Adolescent flexibility, endurance strength, and physical activity as predictors of adult tension neck, low back pain, and knee injury: a 25 year follow up study. *Br J Sports Med*. 2006;40(2):107–113.
44. Tubach F, Leclerc A, Landre MF, et al. Risk factors for sick leave due to low back pain: a prospective study. *J Occup Environ Med*. 2002;44(5):451–458.
45. Webb R, Brammah T, Lunt M, et al. Prevalence and predictors of intense, chronic, and disabling neck and back pain in the UK general population. *Spine (Phila Pa 1976)*. 2003;28(11):1195–1202.
46. Bergenudd H, Nilsson B. The prevalence of locomotor complaints in middle age and their relationship to health and socioeconomic factors. *Clin Orthop Relat Res*. 1994 Nov; (308):264–270.
47. Skov T, Borg V, Orhede E. Psychosocial and physical risk factors for musculoskeletal disorders of the neck, shoulders, and lower back in salespeople. *Occup Environ Med*. 1996;53(5):351–356.
48. Svensson HO, Vedin A, Wilhelmsson C, et al. Low-back pain in relation to other diseases and cardiovascular risk factors. *Spine (Phila Pa 1976)*. 1983;8(3):277–285.
49. Holmström EB, Lindell J, Moritz U. Low back and neck/shoulder pain in construction workers: occupational workload and psychosocial risk factors. Part 1: relationship to low back pain. *Spine (Phila Pa 1976)*. 1992;17(6):663–671.
50. Jefferson JR, McGrath PJ. Back pain and peripheral joint pain in an industrial setting. *Arch Phys Med Rehabil*. 1996;77(4):385–390.
51. Kopeck JA, Sayre EC, Esdaile JM. Predictors of back pain in a general population cohort. *Spine (Phila Pa 1976)*. 2004;29(1):70–77; discussion 77–78.
52. Szpalski M, Gunzburg R, Balagué F, et al. A 2-year prospective longitudinal study on low back pain in primary school children. *Eur Spine J*. 2002;11(5):459–464.
53. Jones GT, Watson KD, Silman AJ, et al. Predictors of low back pain in British schoolchildren: a population-based prospective cohort study. *Pediatrics*. 2003;111(4 pt 1):822–828.
54. Miyamoto M, Konno S, Gembun Y, et al. Epidemiological study of low back pain and occupational risk factors among taxi drivers. *Ind Health*. 2008;46(2):112–117.
55. Alcouffe J, Manillier P, Brehier M, et al. Analysis by sex of low back pain among workers from small companies in the Paris area: severity and occupational consequences. *Occup Environ Med*. 1999;56(10):696–701.
56. Andersen RE, Crespo CJ, Bartlett SJ, et al. Relationship between body weight gain and significant knee, hip, and back pain in older Americans. *Obes Res*. 2003;11(10):1159–1162.
57. Hartvigsen J, Christensen K, Frederiksen H. Back and neck pain exhibit many common features in old age: a population-based study of 4,486 Danish twins 70–102 years of age. *Spine (Phila Pa 1976)*. 2004;29(5):576–580.
58. Leboeuf-Yde C, Kjaer P, Bendix T, et al. Self-reported hard physical work combined with heavy smoking or overweight may result in so-called Modic changes [electronic article]. *BMC Musculoskelet Disord*. 2008;9:5.
59. Leboeuf-Yde C, Yashin A, Lauritzen T. Does smoking cause low back pain? Results from a population-based study. *J Manipulative Physiol Ther*. 1996;19(2):99–108.
60. Pietri F, Leclerc A, Boitel L, et al. Low-back pain in commercial travelers. *Scand J Work Environ Health*. 1992;18(1):52–58.
61. Eriksen W, Natvig B, Bruusgaard D. Smoking, heavy physical work and low back pain: a four-year prospective study. *Occup Med (Lond)*. 1999;49(3):155–160.
62. Liira JP, Shannon HS, Chambers LW, et al. Long-term back problems and physical work exposures in the 1990 Ontario Health Survey. *Am J Public Health*. 1996;86(3):382–387.
63. Symmons DP, van Hemert AM, Vandenbroucke JP, et al. A longitudinal study of back pain and radiological changes in the lumbar spines of middle aged women. I. Clinical findings. *Ann Rheum Dis*. 1991;50(3):158–161.
64. Alexopoulos EC, Konstantinou EC, Bakoyannis G, et al. Risk factors for sickness absence due to low back pain and

- prognostic factors for return to work in a cohort of shipyard workers. *Eur Spine J*. 2008;17(9):1185–1192.
65. Feldman DE, Shrier I, Rossignol M, et al. Risk factors for the development of low back pain in adolescence. *Am J Epidemiol*. 2001;154(1):30–36.
  66. Andersson H, Ejlertsson G, Leden I. Widespread musculoskeletal chronic pain associated with smoking. An epidemiological study in a general rural population. *Scand J Rehabil Med*. 1998;30(3):185–191.
  67. Leroux I, Dionne CE, Bourbonnais R, et al. Prevalence of musculoskeletal pain and associated factors in the Quebec working population. *Int Arch Occup Environ Health*. 2005;78(5):379–386.
  68. Vikat A, Rimpelä M, Salminen JJ, et al. Neck or shoulder pain and low back pain in Finnish adolescents. *Scand J Public Health*. 2000;28(3):164–173.
  69. Riihimäki H, Viikari-Juntura E, Takala E, et al. Factors predicting pain in the low back and lower limbs in forestry work. *Työ ja Ihminen (People and Work Research Reports)*. 1993;7:344–350.
  70. Ghaffari M, Alipour A, Jensen I, et al. Low back pain among Iranian industrial workers. *Occup Med (Lond)*. 2006;56(7):455–460.
  71. Jacob T. Low back pain incident episodes: a community-based study. *Spine J*. 2006;6(3):306–310.
  72. Spyropoulos P, Papathanasiou G, Georgoudis G, et al. Prevalence of low back pain in Greek public office workers. *Pain Physician*. 2007;10(5):651–659.
  73. Harreby M, Nygaard B, Jessen T, et al. Risk factors for low back pain in a cohort of 1389 Danish school children: an epidemiologic study. *Eur Spine J*. 1999;8(6):444–450.
  74. Spahn G, Schiele R, Langlotz A, et al. Prevalence of functional pain of the back, the hip and the knee in adolescents. Results of a cross-sectional study [in German]. *Dtsch Med Wochenschr*. 2004;129(43):2285–2290.
  75. Miyamoto M, Shirai Y, Nakayama Y, et al. An epidemiologic study of occupational low back pain in truck drivers. *J Nippon Med Sch*. 2000;67(3):186–190.
  76. Cecchi F, Debolini P, Lova RM, et al. Epidemiology of back pain in a representative cohort of Italian persons 65 years of age and older: the InCHIANTI study. *Spine (Phila Pa 1976)*. 2006;31(10):1149–1155.
  77. Heistaro S, Vartiainen E, Heliövaara M, et al. Trends of back pain in eastern Finland, 1972–1992, in relation to socioeconomic status and behavioral risk factors. *Am J Epidemiol*. 1998;148(7):671–682.
  78. Al-Arfaj AS, Al-Saleh SS, Alballa SR, et al. How common is back pain in Al-Qaseem region. *Saudi Med J*. 2003;24(2):170–173.
  79. Deyo RA, Bass JE. Lifestyle and low-back pain. The influence of smoking and obesity. *Spine (Phila Pa 1976)*. 1989;14(5):501–506.
  80. Heliövaara M, Mäkelä M, Knekt P, et al. Determinants of sciatica and low-back pain. *Spine (Phila Pa 1976)*. 1991;16(6):608–614.
  81. Lehto TU, Helenius HY, Alaranta HT. Musculoskeletal symptoms of dentists assessed by a multidisciplinary approach. *Community Dent Oral Epidemiol*. 1991;19(1):38–44.
  82. Mohseni-Bandpei MA, Bagheri-Nesami M, Shayesteh-Azar M. Nonspecific low back pain in 5000 Iranian school-age children. *J Pediatr Orthop*. 2007;27(2):126–129.
  83. Poussa MS, Heliövaara MM, Seitsamo JT, et al. Anthropometric measurements and growth as predictors of low-back pain: a cohort study of children followed up from the age of 11 to 22 years. *Eur Spine J*. 2005;14(6):595–598.
  84. Nissinen M, Heliövaara M, Seitsamo J, et al. Anthropometric measurements and the incidence of low back pain in a cohort of pubertal children. *Spine (Phila Pa 1976)*. 1994;19(12):1367–1370.
  85. Craft RM, Mogil JS, Aloisi AM. Sex differences in pain and analgesia: the role of gonadal hormones. *Eur J Pain*. 2004;8(5):397–411.
  86. Snijder MB, van Dam RM, Visser M, et al. What aspects of body fat are particularly hazardous and how do we measure them? *Int J Epidemiol*. 2006;35(1):83–92.
  87. Peters JL, Sutton AJ, Jones DR, et al. Performance of the trim and fill method in the presence of publication bias and between-study heterogeneity. *Stat Med*. 2007;26(25):4544–4562.
  88. Hu HY, Chou YJ, Chou P, et al. Association between obesity and injury among Taiwanese adults. *Int J Obes (Lond)*. 2009;33(8):878–884.
  89. Tilg H, Moschen AR. Adipocytokines: mediators linking adipose tissue, inflammation and immunity. *Nat Rev Immunol*. 2006;6(10):772–783.
  90. Karppinen J. New perspectives on sciatica. In: DeLeo JA, Sorkin LS, Watkins LR, eds. *Immune and Glial Regulation of Pain*. Seattle, WA: IASP Press; 2007.
  91. Han TS, Schouten JS, Lean ME, et al. The prevalence of low back pain and associations with body fatness, fat distribution and height. *Int J Obes Relat Metab Disord*. 1997;21(7):600–607.
  92. Shiri R, Solovieva S, Husgafvel-Pursiainen K, et al. The association between obesity and the prevalence of low back pain in young adults: the Cardiovascular Risk in Young Finns Study. *Am J Epidemiol*. 2008;167(9):1110–1119.
  93. Leino-Arjas P, Solovieva S, Kirjonen J, et al. Cardiovascular risk factors and low-back pain in a long-term follow-up of industrial employees. *Scand J Work Environ Health*. 2006;32(1):12–19.
  94. Strine TW, Hootman JM. US national prevalence and correlates of low back and neck pain among adults. *Arthritis Rheum*. 2007;57(4):656–665.
  95. Liuke M, Solovieva S, Lamminen A, et al. Disc degeneration of the lumbar spine in relation to overweight. *Int J Obes (Lond)*. 2005;29(8):903–908.
  96. Kuisma M, Karppinen J, Haapea M, et al. Are the determinants of vertebral endplate changes and severe disc degeneration in the lumbar spine the same? A magnetic resonance imaging study in middle-aged male workers [electronic article]. *BMC Musculoskelet Disord*. 2008;9:51.
  97. Mellin G. Correlations of spinal mobility with degree of chronic low back pain after correction for age and anthropometric factors. *Spine (Phila Pa 1976)*. 1987;12(5):464–468.
  98. Howard BV, Ruotolo G, Robbins DC. Obesity and dyslipidemia. *Endocrinol Metab Clin North Am*. 2003;32(4):855–867.
  99. Kauppila LI, McAlindon T, Evans S, et al. Disc degeneration/back pain and calcification of the abdominal aorta. A 25-year follow-up study in Framingham. *Spine (Phila Pa 1976)*. 1997;22(14):1642–1647; discussion 1648–1649.
  100. Korkiakoski A, Niinimäki J, Karppinen J, et al. Association of lumbar arterial stenosis with low back symptoms: a cross-sectional study using two-dimensional time-of-flight magnetic resonance angiography. *Acta Radiol*. 2009;50(1):48–54.
  101. Cheung KM, Karppinen J, Chan D, et al. Prevalence and pattern of lumbar magnetic resonance imaging changes in a population study of one thousand forty-three individuals. *Spine (Phila Pa 1976)*. 2009;34(9):934–940.
  102. Mattila R, Malmivaara A, Kastarinen M, et al. The effects of lifestyle intervention for hypertension on low back pain:

- a randomized controlled trial. *Spine (Phila Pa 1976)*. 2007; 32(26):2943–2947.
103. Melissas J, Volakakis E, Hadjipavlou A. Low-back pain in morbidly obese patients and the effect of weight loss following surgery. *Obes Surg*. 2003;13(3):389–393.
  104. Hooper MM, Stellato TA, Hallowell PT, et al. Musculoskeletal findings in obese subjects before and after weight loss following bariatric surgery. *Int J Obes (Lond)*. 2007;31(1): 114–120.
  105. Peltonen M, Lindroos AK, Torgerson JS. Musculoskeletal pain in the obese: a comparison with a general population and long-term changes after conventional and surgical obesity treatment. *Pain*. 2003;104(3):549–557.
  106. McGoey BV, Deitel M, Saplys RJ, et al. Effect of weight loss on musculoskeletal pain in the morbidly obese. *J Bone Joint Surg Br*. 1990;72(2):322–323.
  107. Matsui H, Maeda A, Tsuji H, et al. Risk indicators of low back pain among workers in Japan. Association of familial and physical factors with low back pain. *Spine (Phila Pa 1976)*. 1997;22(11):1242–1247; discussion 1248.
  108. Leino-Arjas P, Hänninen K, Puska P. Socioeconomic variation in back and joint pain in Finland. *Eur J Epidemiol*. 1998; 14(1):79–87.
  109. Watson KD, Papageorgiou AC, Jones GT, et al. Low back pain in schoolchildren: the role of mechanical and psychosocial factors. *Arch Dis Child*. 2003;88(1):12–17.
  110. Schneider S, Schmitt H, Zoller S, et al. Workplace stress, lifestyle and social factors as correlates of back pain: a representative study of the German working population. *Int Arch Occup Environ Health*. 2005;78(4):253–269.
  111. Leboeuf-Yde C, Kyvik KO, Bruun NH. Low back pain and lifestyle. Part II—obesity. Information from a population-based sample of 29,424 twin subjects. *Spine (Phila Pa 1976)*. 1999;24(8):779–783; discussion 783–774.
  112. Wright D, Barrow S, Fisher AD, et al. Influence of physical, psychological and behavioural factors on consultations for back pain. *Br J Rheumatol*. 1995;34(2):156–161.
  113. Sjolie AN. Low-back pain in adolescents is associated with poor hip mobility and high body mass index. *Scand J Med Sci Sports*. 2004;14(3):168–175.
  114. Calza S, Decarli A, Ferraroni M. Obesity and prevalence of chronic diseases in the 1999–2000 Italian National Health Survey [electronic article]. *BMC Public Health*. 2008; 8:140.
  115. Torres M, Azen S, Varma R. Prevalence of obesity and associated co-morbid conditions in a population-based sample of primarily urban Mexican Americans. *Ethn Dis*. 2006;16(2): 362–369.
  116. Van Nieuwenhuysse A, Crombez G, Burdorf A, et al. Physical characteristics of the back are not predictive of low back pain in healthy workers: a prospective study [electronic article]. *BMC Musculoskelet Disord*. 2009;10:2.
  117. Lake JK, Power C, Cole TJ. Back pain and obesity in the 1958 British birth cohort. Cause or effect? *J Clin Epidemiol*. 2000;53(3):245–250.
  118. Mustard CA, Kalcevic C, Frank JW, et al. Childhood and early adult predictors of risk of incident back pain: Ontario Child Health Study 2001 follow-up. *Am J Epidemiol*. 2005; 162(8):779–786.
  119. van den Heuvel SG, Ariëns GA, Boshuizen HC, et al. Prognostic factors related to recurrent low-back pain and sickness absence. *Scand J Work Environ Health*. 2004; 30(6):459–467.
  120. Mattila VM, Sahi T, Jormanainen V, et al. Low back pain and its risk indicators: a survey of 7,040 Finnish male conscripts. *Eur Spine J*. 2008;17(1):64–69.
  121. Elders LA, Burdorf A. Prevalence, incidence, and recurrence of low back pain in scaffolders during a 3-year follow-up study. *Spine (Phila Pa 1976)*. 2004;29(6):E101–E106.
  122. Erbay Dünder P, Cengiz Ozyurt B, Ozmen D. The prevalence of low back pain and its relationship with household jobs and other factors in a group of women in a rural area in Manisa [in Turkish]. *Agri*. 2006;18(4):51–56.
  123. Wijnhoven HA, de Vet HC, Smit HA, et al. Hormonal and reproductive factors are associated with chronic low back pain and chronic upper extremity pain in women—the MORGEN study. *Spine (Phila Pa 1976)*. 2006;31(13):1496–1502.
  124. Power C, Frank J, Hertzman C, et al. Predictors of low back pain onset in a prospective British study. *Am J Public Health*. 2001;91(10):1671–1678.
